# Supplementary material for: DIP2 is a unique regulator of diacylglycerol lipid homeostasis in eukaryotes
Source: eLife journal article supplement (doi:10.7554/elife.77665), 2022-06-29
Supplement: fig3-figsupp2-data1 [file elife-77665-fig3-figsupp2-data1-v2.pdf]

# Figure 3-figure supplement 2B- source data 1

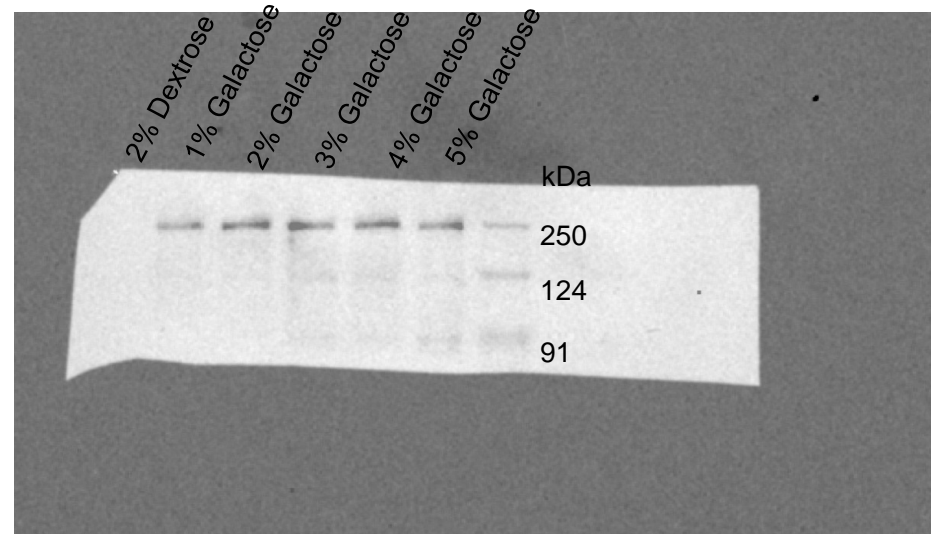

Image 1

Anti GFP

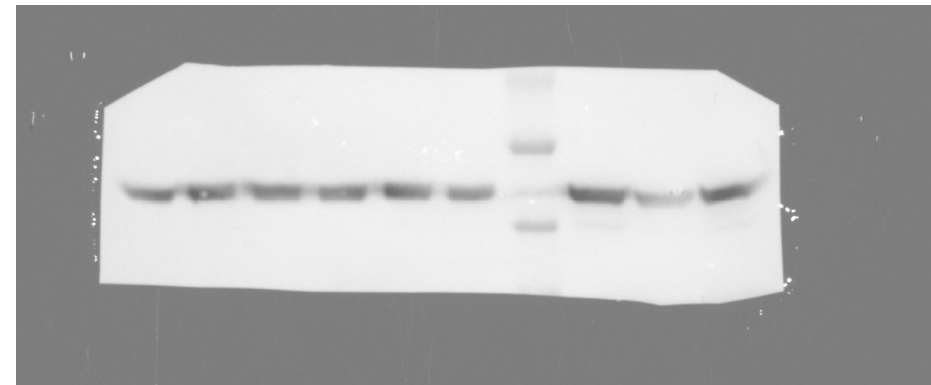

Image 2

Anti PGK
