# Supplementary material for: DIP2 is a unique regulator of diacylglycerol lipid homeostasis in eukaryotes
Source: eLife journal article supplement (doi:10.7554/elife.77665), 2022-06-29
Supplement: fig5-figsupp1-data1 [file elife-77665-fig5-figsupp1-data1-v2.pdf]

# Figure 4-figure supplement 1B -source data 1

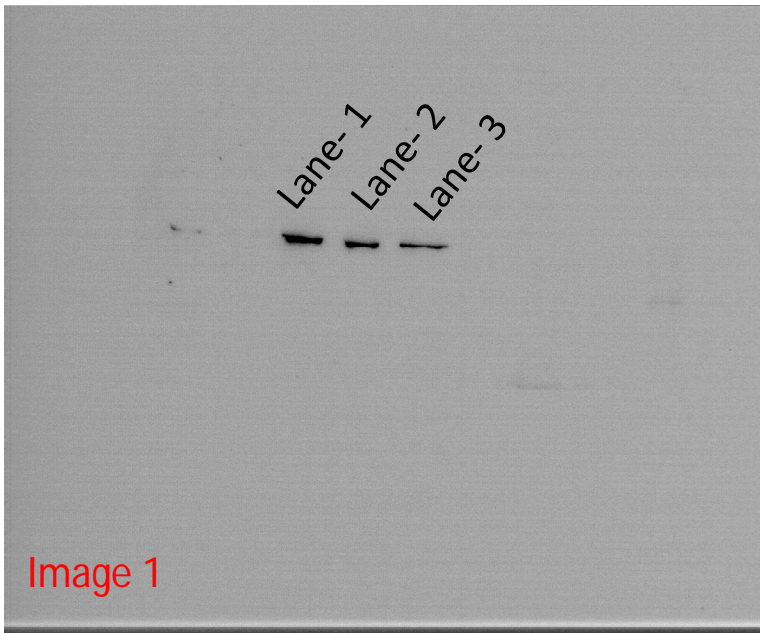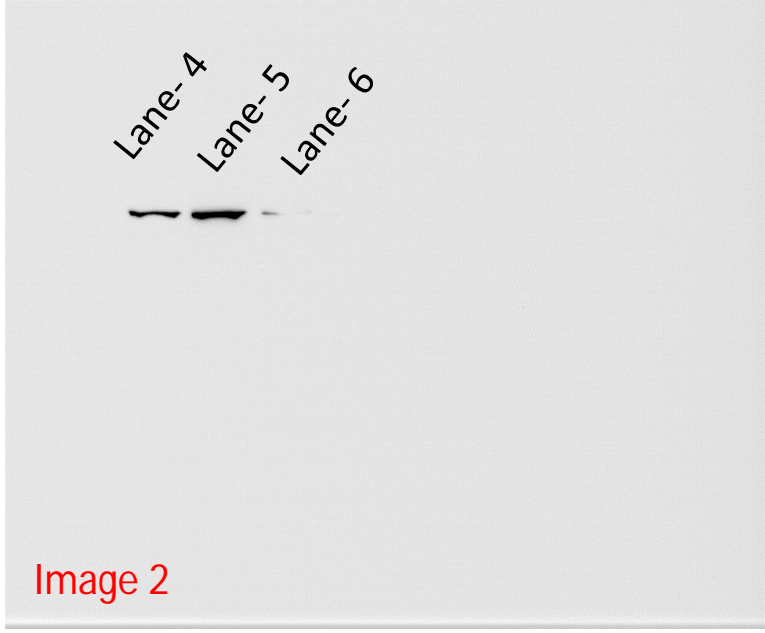

- Lane-1: not part of study
- Lane-2: total lysate
- Lane-3: crude organelle lysate (devoid of cell wall debris and nuclei)
- Lane-4: not part of study
- Lane-5: crude membrane fraction
- Lane-6: membrane-less supernatant

Anti-GFP

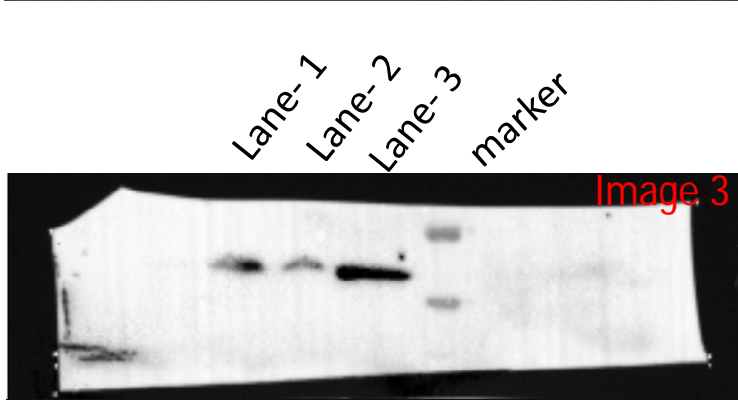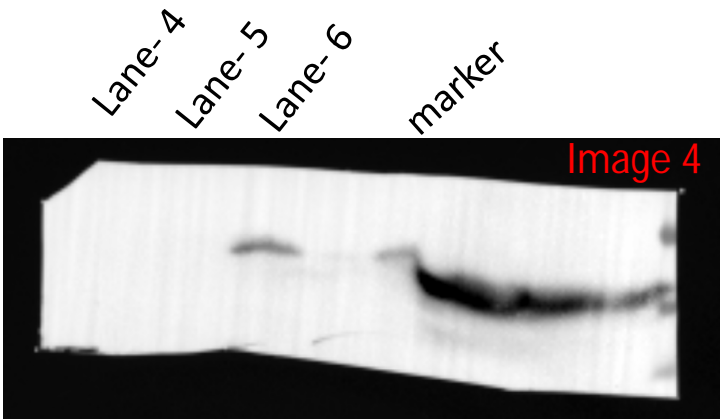

Anti-PGK1
