# Supplementary material for: DIP2 is a unique regulator of diacylglycerol lipid homeostasis in eukaryotes
Source: eLife journal article supplement (doi:10.7554/elife.77665), 2022-06-29

# Figure 7-figure supplement 2C- source data 1

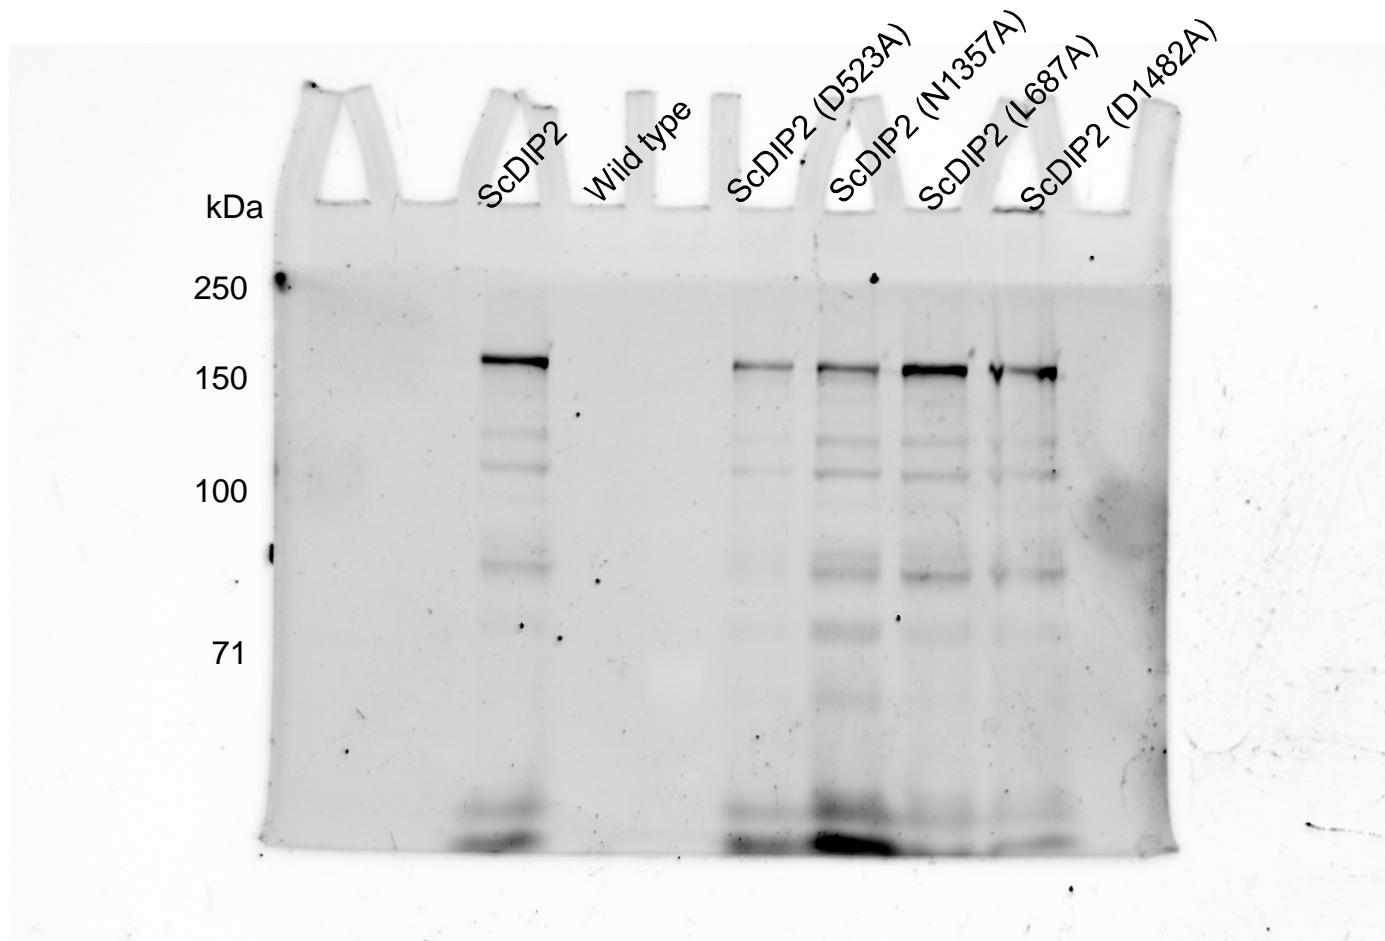

Supplement: fig7-figsupp2-data1 [file elife-77665-fig7-figsupp2-data1-v2.pdf]
