# Supplementary material for: DIP2 is a unique regulator of diacylglycerol lipid homeostasis in eukaryotes
Source: eLife. 2022 Jun 29;11:e77665. doi: 10.7554/eLife.77665 (PMC9342972; doi:10.7554/eLife.77665)
Supplement: Figure 1—figure supplement 2—source data 3. [file elife-77665-fig1-figsupp2-data3.xlsx]

## Sheet: Sheet1
Quantification of lipids from metabolic radiolabelling experiment in yeast and statistical analysis
		Raw values (A.U)			Pecentage of the total lipid
		Wild type-I	Wild type-II	Wild type-III	Wild type-I	Wild type-II	Wild type-III	Avg	SEM	p-value	Significance
Wild type	PE	124.408	517.767	329.312	2.5646	4.07408	4.66989	3.76952	0.511561	Reference
	PI	140.43	549.763	306.334	2.89488	4.32585	4.34404	3.85492	0.391958	Reference
	PS	43.617	136.902	82.254	0.89914	1.07722	1.16642	1.04759	0.0641497	Reference
	PC	179.441	969.815	453.39	3.69907	7.63105	6.4294	5.91984	0.949836	Reference
	Total	4850.97	12708.8	7051.82	99.9999	100	100	100	9.82394e-06
		Wild type-I	Wild type-II	Wild type-III	Wild type-I	Wild type-II	Wild type-III
	ErgE	748.675	805.411	602.675	12.8935	9.87237	11.3705	11.3788	0.712083	Reference
	TAG	1847.38	2425.98	1453.51	31.8151	29.7366	27.4228	29.6581	1.03578	Reference
	FFA	488.795	395.472	450.751	8.41788	4.84752	8.50416	7.25652	0.983679	Reference
	Erg	124.493	282.589	110.557	2.14398	3.46385	2.08584	2.56456	0.367391	Reference
	Total	5806.63	8158.23	5300.36	99.9999	100	100	100	3.41118e-05
		Raw values (A.U)			Pecentage of the total lipid			Avg	SEM	p-value	Significance
		ΔScDIP2- I	ΔScDIP2- II	ΔScDIP2- III	ΔScDIP2- I	ΔScDIP2- II	ΔScDIP2- III
ΔScDIP2	PE	119.656	182.005	132.038	3.19327	4.44794	4.87895	4.17339	0.412826	0.642276	ns
	PI	192.521	187.271	155.378	5.13783	4.57664	5.74139	5.15195	0.274594	0.0913348	ns
	PS	42.867	46.981	42.745	1.144	1.14815	1.57947	1.29054	0.117961	0.213659	ns
	PC	278.123	323.044	267.533	7.42229	7.89474	9.88564	8.40089	0.616289	0.148098	ns
	Total	3747.13	4091.89	2706.28	99.9999	100	100	100	1.3955e-05
		ΔScDIP2- I	ΔScDIP2- II	ΔScDIP2- III	ΔScDIP2- I	ΔScDIP2- II	ΔScDIP2- III
	ErgE	386.216	338.55	241.317	12.612	11.3315	8.64446	10.8627	0.954545	0.741313	ns
	TAG	757.688	650.321	458.49	24.7425	21.7667	16.424	20.9777	1.98697	0.0340844	*
	FFA	148.643	167.45	123.979	4.85398	5.60466	4.44118	4.96661	0.278064	0.141383	ns
	Erg	56.328	55.369	52.811	1.83941	1.85324	1.8918	1.86148	0.0127984	0.193413	ns
	Total	3062.29	2987.69	2791.58	99.9999	99.9999	100	100	7.07967e-05
