# Supplementary material for: DIP2 is a unique regulator of diacylglycerol lipid homeostasis in eukaryotes
Source: eLife. 2022 Jun 29;11:e77665. doi: 10.7554/eLife.77665 (PMC9342972; doi:10.7554/eLife.77665)
Supplement: Figure 1—source data 1. [file elife-77665-fig1-data1.xlsx]

## Sheet: Sequence identity
Prokaryotic /Plant FAAL	MtbFAAL28/1-580
	5HM3_MtbFAAL32/1-657	0.3413
	3KXW_LpFAAL/1-590	0.2982	0.2711
	3PBK_EcFAAL/1-583	0.2672	0.2658	0.2658
	ZmFAAL_517-1065/1-549	0.2877	0.275	0.3096	0.2677
Fungal FLD1	ScDip2_159-893/1-735	0.1568	0.1369	0.1796	0.1234	0.1785
	SpDip2_497-1111/1-624	0.1758	0.1746	0.1864	0.1612	0.1748	0.1939
	RiDip2_233-895/1-663	0.1844	0.1674	0.2186	0.1835	0.2131	0.2262	0.3269
	CcDip2_354-945/1-592	0.1655	0.1621	0.1728	0.1578	0.1693	0.1891	0.2432	0.2922
	NcDip2_318-1002/1-685	0.1896	0.1582	0.205	0.1835	0.1857	0.2408	0.3092	0.377	0.2719
Animal FLD1	CeDip2_67-641/1-575	0.2017	0.2017	0.2034	0.1913	0.1912	0.1721	0.2191	0.1982	0.1652	0.1947
	DmDip2_440-1042/1-698	0.1913	0.1811	0.2016	0.2161	0.1894	0.1547	0.1987	0.199	0.1807	0.1854	0.5495
	DrDip2ba_339-91/1-678	0.2103	0.1933	0.1864	0.1886	0.1985	0.1519	0.2083	0.199	0.1807	0.1917	0.5147	0.5176
	MmDip2a_286-860/1-679	0.2034	0.1735	0.1915	0.1955	0.1967	0.1443	0.2067	0.1975	0.1908	0.187	0.5026	0.5405	0.6696
	HsDip2a_396-827/1-567	0.1728	0.1851	0.1657	0.1869	0.1766	0.1534	0.2098	0.2204	0.1816	0.1975	0.4779	0.5837	0.7089	0.9382
Fungal FLD2	ScDip2_950-1648/1-699	0.1465	0.1369	0.1542	0.132	0.1584	0.1173	0.133	0.1266	0.1283	0.1036	0.1234	0.1103	0.1061	0.1134	0.1287
	NcDip2_1087-1659/1-573	0.1692	0.1849	0.1937	0.1448	0.1948	0.1675	0.1623	0.1815	0.1937	0.171	0.1605	0.1745	0.1919	0.178	0.1622	0.3089
	CcDip2_1043-1643/1-601	0.1862	0.178	0.1779	0.1509	0.1803	0.1747	0.1713	0.193	0.1604	0.1813	0.186	0.1813	0.1846	0.1797	0.1657	0.2063	0.3123
	RiDip2_977-1564/1-584	0.1689	0.1746	0.1917	0.1543	0.1948	0.1506	0.1746	0.2054	0.178	0.1832	0.1756	0.1832	0.1815	0.1712	0.1587	0.2808	0.4572	0.3167
	SpDip2/1-667	0.1706	0.1735	0.1694	0.1492	0.1857	0.1244	0.165	0.1794	0.1587	0.1589	0.1791	0.1724	0.1739	0.1784	0.1869	0.2098	0.3821	0.3111	0.3493
Animal FLD2	CeDip2_703-1286/1-605	0.1965	0.1933	0.2152	0.1801	0.2003	0.1603	0.1636	0.1917	0.1722	0.1884	0.1652	0.19	0.19	0.195	0.1922	0.1818	0.2478	0.2063	0.2363	0.2264
	DmDip2_1138-176/1-636	0.2034	0.1902	0.2457	0.1732	0.2167	0.1713	0.1891	0.1855	0.1908	0.1918	0.1913	0.2075	0.1855	0.1949	0.1922	0.1761	0.2547	0.2246	0.2705	0.2342	0.5123
	DrDip2_1017-156/1-561	0.2156	0.2085	0.2245	0.1764	0.2222	0.1782	0.1871	0.2067	0.1889	0.2156	0.2085	0.2156	0.2121	0.2317	0.2049	0.1978	0.2584	0.2228	0.2745	0.2495	0.5204	0.647
	MmDip2a_965-151/1-559	0.2057	0.2003	0.2415	0.186	0.2131	0.186	0.2003	0.211	0.1717	0.2164	0.2146	0.2289	0.2093	0.2254	0.2182	0.186	0.2593	0.2218	0.2486	0.254	0.5169	0.669	0.7817
	HsDip2a_963-156/1-609	0.2137	0.1954	0.2423	0.1818	0.2094	0.1789	0.1904	0.2019	0.1672	0.2068	0.2069	0.2216	0.2019	0.22	0.2151	0.1756	0.2513	0.2096	0.2397	0.2397	0.4925	0.6288	0.7825	0.9749
		MtbFAAL28/1-580	5HM3_MtbFAAL32/1-657	3KXW_LpFAAL/1-590	3PBK_EcFAAL/1-583	ZmFAAL_517-1065/1-549	ScDip2_159-893/1-735	SpDip2_497-1111/1-624	RiDip2_233-895/1-663	CcDip2_354-945/1-592	NcDip2_318-1002/1-685	CeDip2_67-641/1-575	DmDip2_440-1042/1-698	DrDip2ba_339-91/1-678	MmDip2a_286-860/1-679	HsDip2a_396-827/1-567	ScDip2_950-1648/1-699	NcDip2_1087-1659/1-573	CcDip2_1043-1643/1-601	RiDip2_977-1564/1-584	SpDip2/1-667	CeDip2_703-1286/1-605	DmDip2_1138-176/1-636	DrDip2_1017-156/1-561	MmDip2a_965-151/1-559	HsDip2a_963-156/1-60
	Prokaryotic /Plant FAAL	FLD1Fungal	FLD1Animal	FLD2Fungal	FLD2Animal
Prokaryotic /Plant FAAL	0.28494
FLD1Fungal	0.17458	0.26704
FLD1Animal	0.191744	0.187536	0.60032
FLD2Fungal	0.168856	0.161748	0.164288	0.31345
FLD2Animal	0.20604	0.188472	0.20554	0.229892	0.6526
