# Supplementary material for: DIP2 is a unique regulator of diacylglycerol lipid homeostasis in eukaryotes
Source: eLife. 2022 Jun 29;11:e77665. doi: 10.7554/eLife.77665 (PMC9342972; doi:10.7554/eLife.77665)
Supplement: Figure 1—source data 2. [file elife-77665-fig1-data2.xlsx]

## Sheet: DAG
Quantification of lipids from metabolic radiolabelling experiment in yeast and statistical analysis
		Raw values (A.U)			Pecentage of the total lipid
		Wild type-I	Wild type-II	Wild type-III	Wild type-I	Wild type-II	Wild type-III	Avg	SEM	p-value	Significance
Wild type	DAG	88.578	112.152	78.677	1.52546	1.37471	1.48437	1.46151	0.0367376	Reference
		Raw values (A.U)			Pecentage of the total lipid			Avg	SEM	p-value	Significance
		ΔScDIP2- I	ΔScDIP2- II	ΔScDIP2- III	ΔScDIP2- I	ΔScDIP2- II	ΔScDIP2- III
ΔScDIP2	DAG	54.916	52.093	51.774	1.7933	1.74359	1.85465	1.79718	0.0262252	0.00371668	**
