# Supplementary material for: DIP2 is a unique regulator of diacylglycerol lipid homeostasis in eukaryotes
Source: eLife. 2022 Jun 29;11:e77665. doi: 10.7554/eLife.77665 (PMC9342972; doi:10.7554/eLife.77665)
Supplement: Figure 1—source data 3. [file elife-77665-fig1-data3.xlsx]

## Sheet: DAG
DAG	Normalized intensities of DAG species from Drosophila					average	SEM	p-value
	Wild type
32:0	1502.49	1678.17	2469.2	3097.59	529.385	1855.37	391.615	Reference
32:1	5203.16	6957.08	8129.64	11556.4	4167.01	7202.65	1150.44	Reference
34:0	2960.07	1426.81	2670.48	3282.01	2582.95	2584.46	281.086	Reference
34:1	6383.89	8708.27	11090.6	15626.4	11356.5	10633.1	1377.33	Reference
34:2	11649.5	14776.1	9073.4	8651.68	10044.2	10839	993.805	Reference
36:0	6385.07	7372.33	8396.73	15512.8	11482.6	9829.91	1483.07	Reference
36:1	210.758	714.787	835.053	969.176	122.039	570.363	152.352	Reference
36:2	220.919	552.659	589.597	859.106	81.1506	460.686	124.153	Reference
	ΔDmDIP2
32:0	3638.07	2784.01	2560.25	2828.28	3568.17	3075.76	197.057	0.037531
32:1	15825.4	16707.4	10189.2	14609.5	14606.4	14387.6	1003.45	0.00295708
34:0	4161.67	5464.98	4116	4358.22	6419.78	4904.13	404.088	0.00293579
34:1	18579.2	17762.5	11054.4	13966.4	15505.4	15373.6	1210.56	0.0495147
34:2	11872	10697.2	15721.9	18903.5	14381	14315.1	1297.61	0.0936444
36:0	12607.2	16443.7	14838.3	9361.76	12691.8	13188.6	1068.59	0.138921
36:1	435.436	877.259	516.615	927.377	243.367	600.011	117.519	0.893789
36:2	719.803	1062.19	705.176	746.825	313.619	709.523	106.326	0.210433
