# Supplementary material for: DIP2 is a unique regulator of diacylglycerol lipid homeostasis in eukaryotes
Source: eLife. 2022 Jun 29;11:e77665. doi: 10.7554/eLife.77665 (PMC9342972; doi:10.7554/eLife.77665)
Supplement: Figure 1—source data 4. [file elife-77665-fig1-data4.xlsx]

## Sheet: DAG
		Quantification of DAG (nmole/mg protein) species from mouse embryonic stem cell lines					average	SEM	p-value
		Wild type
	32:0	1.204	0.767	1.149	1.121	0.8806	1.02432	0.0759068	Reference
	32:1	0.664	0.426	0.321	0.3	0.3019	0.40258	0.0620333	Reference
	34:0	1.055	1.27	1.014	0.869	0.6136	0.96432	0.0972053	Reference
	34:1	1.833	1.445	1.935	1.715	1.8589	1.75738	0.0766683	Reference
	36:0	2.013	1.122	1.551	0.527	2.5042	1.54344	0.306879	Reference
	36:1	2.141	3.121	1.985	1.137	2.2467	2.12614	0.283042	Reference
	36:2	2.172	1.043	1.121	2.103	2.1258	1.71296	0.230872	Reference
		ΔMmDIP2A
	32:0	10.328	8.508	7.567	6.731	11.916	9.01	0.841666	2.9339e-05
	32:1	3.883	5.476	4.37	6.414	5.937	5.216	0.424982	8.33634e-06
	34:0	2.986	3.247	4.209	5.283	3.566	3.8582	0.367303	0.00013609
	34:1	4.595	7.096	6.662	7.405	7.322	6.616	0.466387	1.58332e-05
	36:0	14.297	12.575	13.75	12.597	10.095	12.6628	0.646784	6.97411e-07
	36:1	16.567	17.629	18.446	21.347	20.578	18.9134	0.801674	1.08013e-07
	36:2	20.663	17.246	22.286	20.369	16.391	19.391	0.991091	2.93163e-07
