# Supplementary material for: DIP2 is a unique regulator of diacylglycerol lipid homeostasis in eukaryotes
Source: eLife. 2022 Jun 29;11:e77665. doi: 10.7554/eLife.77665 (PMC9342972; doi:10.7554/eLife.77665)
Supplement: Figure 2—figure supplement 1—source data 1. [file elife-77665-fig2-figsupp1-data1.xlsx]

## Sheet: Sheet1
		DAG (nmole/mg protein) species from yeast strains						average	SEM	p-value
		Wild type
	32:0	4.40091	3.43689	2.68564	2.31405	2.94564	2.41825	3.03356	0.291423	Reference
	32:1	16.5527	24.5936	20.1983	17.8106	27.9693	25.3565	22.0802	1.70014	Reference
	34:0	3.43288	2.55573	1.7089	1.43346	1.87116	1.60724	2.10156	0.282679	Reference
	34:1	23.1802	22.5962	17.337	16.0022	23.1175	19.5923	20.3042	1.16973	Reference
	34:2	0.128619	0.206496	0.161778	0.13544	0.134419	0.108181	0.145822	0.0127873	Reference
	36:0	4.31979	1.61684	1.86557	1.33309	1.09243	0.962467	1.86503	0.464936	Reference
	36:1	7.32104	6.43912	4.37686	3.55795	5.73278	4.86699	5.38246	0.516482	Reference
	36:2	0.06338	0.114164	0.088763	0.064359	0.058451	0.05679	0.0743178	0.00845606	Reference
	36:4	0.01123	0.014187	0.024905	0.025422	0.014771	0.012503	0.0171697	0.00235492	Reference
		ΔScDIP2
	32:0	3.57235	8.07579	2.81356	1.86555	7.1028	5.41265	4.80712	0.920036	0.124356
	32:1	25.4572	19.6472	27.5617	14.3183	19.7729	18.1994	20.8261	1.81479	0.655115
	34:0	2.81459	6.4424	1.76094	1.27334	5.86671	4.25936	3.73622	0.798488	0.108606
	34:1	23.3788	17.9674	23.0893	12.82	16.3903	14.3291	17.9958	1.64767	0.321562
	34:2	0.186745	0.123903	0.148568	0.09412	0.119905	0.093476	0.127786	0.0132244	0.391807
	36:0	52.1951	33.4754	45.9614	22.5757	27.7798	25.1763	34.5273	4.47153	5.83711e-05
	36:1	49.9353	38.5388	54.0633	28.086	38.7852	35.6989	40.8513	3.55978	4.13237e-06
	36:2	0.071096	0.055777	0.055875	0.042575	0.057234	0.042425	0.0541637	0.0039922	0.0774666
	36:4	0.013288	0.012763	0.023344	0.020195	0.01136	0.010401	0.0152252	0.00196244	0.575356
		ΔScDIP2-70 (Biological replicate)
	32:0	3.38881	3.167	8.58226	2.32563	2.19886	6.97469	4.43954	0.997243	0.244933
	32:1	26.6434	24.7488	23.819	20.1664	21.9603	19.4583	22.7994	1.03301	0.748193
	34:0	2.30616	2.12074	6.9094	1.38391	1.25684	4.94451	3.15359	0.847019	0.30741
	34:1	21.4293	18.5917	17.9884	15.3627	15.7155	14.9866	17.3457	0.924916	0.100219
	34:2	0.157603	0.162371	0.142117	0.153978	0.130803	0.142751	0.14827	0.00438412	0.871974
	36:0	42.7581	36.5055	30.6157	26.5795	26.016	25.2448	31.2866	2.61259	1.42319e-06
	36:1	52.2621	48.5457	46.7218	39.5571	43.076	38.1682	44.7218	2.0263	9.46373e-09
	36:2	0.085951	0.073637	0.065275	0.066913	0.060286	0.060172	0.0687057	0.00365307	0.590316
	36:4	0.021896	0.018312	0.01418	0.02065	0.011284	0.011085	0.0162345	0.00175682	0.777322
		ΔScDIP2-ES (Biological replicate)
	32:0	5.36114	7.54368	6.84336	2.41285	5.78683	2.57996	5.08797	0.801411	0.0525086
	32:1	14.5815	33.4675	26.7879	22.0626	26.5676	16.8188	23.381	2.61265	0.711203
	34:0	3.91963	5.55777	5.12582	1.45246	4.69791	1.9819	3.78925	0.634294	0.0508184
	34:1	11.615	31.5266	24.6092	18.8058	23.4611	15.0404	20.843	2.67786	0.869698
	34:2	0.110054	0.192595	0.147155	0.109044	0.165051	0.090745	0.135774	0.0145477	0.645969
	36:0	28.4657	36.9031	47.4609	31.2662	42.3311	21.9259	34.7255	3.49508	6.84125e-06
	36:1	28.6021	45.6479	52.5456	43.2767	52.1134	32.9907	42.5294	3.67959	3.65001e-06
	36:2	0.044439	0.075057	0.060561	0.044542	0.067974	0.038033	0.055101	0.00555341	0.113574
	36:4	0.007387	0.012065	0.012201	0.011393	0.009862	0.012632	0.0109233	0.000739896	0.0435061
