# Supplementary material for: DIP2 is a unique regulator of diacylglycerol lipid homeostasis in eukaryotes
Source: eLife. 2022 Jun 29;11:e77665. doi: 10.7554/eLife.77665 (PMC9342972; doi:10.7554/eLife.77665)
Supplement: Figure 2—figure supplement 1—source data 2. [file elife-77665-fig2-figsupp1-data2.xlsx]

## Sheet: Sheet1
										Average		SEM
	PC (nmol/mg protein)	Wild type				ΔScDIP2				Wild type	ΔScDIP2	Wild type	ΔScDIP2	p value
	40:6	0.00627153	0.00767541	0.0102437	0.0117384	0.00886518	0.00969558	0.00891402	0.0100786	0.00898226	0.00938834	0.0010678	0.000258546	0.759746
	38:4	0.00860598	0.00719491	0.00963055	0.0128289	0.0133239	0.0125538	0.0130656	0.00992895	0.00956508	0.0122181	0.00103665	0.000675188	0.112667
	36:4	0.00297888	0.0024982	0.00560058	0.00959844	0.00710585	0.00411064	0.00458913	0.00318715	0.00516903	0.00474819	0.00140837	0.000725742	0.825709
	36:2	3.10654	3.18279	3.56768	4.71655	4.15453	3.82992	3.79668	3.09555	3.64339	3.71917	0.321885	0.193119	0.866964
	36:1	4.30899	4.60061	4.96504	6.57016	5.1811	4.93505	4.85344	3.87443	5.1112	4.711	0.436905	0.248915	0.516418
	36:0	1.34631	1.74525	1.99429	2.80753	1.77307	2.32393	2.07492	1.82593	1.97335	1.99946	0.267102	0.109643	0.940107
	34:2	7.06396	7.28005	8.28085	10.4854	9.26652	8.46572	9.1526	7.22506	8.27757	8.52747	0.677428	0.405975	0.793247
	34:1	10.5295	10.7525	11.9173	15.8153	13.2449	12.4834	12.8242	10.3172	12.2536	12.2174	1.06139	0.564889	0.980044
	34:0	3.10642	3.32891	3.68972	4.95035	3.87833	3.68267	3.7332	3.01153	3.76885	3.57643	0.356597	0.166981	0.686898
	32:1	12.313	12.2679	14.191	19.3325	15.3461	14.5613	15.6181	12.7324	14.5261	14.5645	1.44073	0.563339	0.983567
	32:0	3.99281	4.25494	4.95961	6.84822	5.18685	4.86751	5.2735	4.28777	5.0139	4.90391	0.558251	0.193262	0.877197
	PS (nmol/mg protein)	Wild type				ΔScDIP2				Wild type	ΔScDIP2	Wild type	ΔScDIP2	p value
	40:6	0.0761031	0.0844934	0.10366	0.128358	0.0870278	0.104716	0.0951335	0.0869309	0.0981536	0.0934519	0.0100482	0.00365284	0.716442
	38:4	0.0058745	0.00641026	0.00696041	0.0123083	0.00851994	0.00726478	0.00890928	0.00911786	0.00788838	0.00845296	0.00129029	0.00035939	0.7276
	36:4	0.0593679	0.0676209	0.090819	0.092283	0.0769039	0.0756139	0.0680468	0.0622776	0.0775227	0.0707106	0.00716895	0.0029645	0.475786
	36:2	0.279402	0.412238	0.472285	0.598068	0.372304	0.502372	0.549237	0.351197	0.440498	0.443778	0.0573309	0.042008	0.96942
	36:1	0.00441029	0.00730634	0.0106812	0.00991126	0.00592185	0.00799012	0.00598368	0.00459404	0.00807728	0.00612242	0.00122946	0.00060641	0.263016
	36;0	0.000746974	0	0	0.00114522	0.000666872	0.000844158	0.00115967	0.000870095	0.000473048	0.000885199	0.000246779	8.8358e-05	0.222198
	34:2	0.0797361	0.109777	0.103588	0.114822	0.060508	0.107856	0.0876043	0.0616816	0.101981	0.0794125	0.0067226	0.00983592	0.152007
	34:1	2.18639	2.34854	2.7765	3.3599	2.46779	2.48508	2.66668	2.07648	2.66783	2.42401	0.227004	0.10762	0.432828
	34:0	0.112145	0.136213	0.163005	0.175496	0.124903	0.139819	0.110903	0.108893	0.146715	0.121129	0.0122452	0.00621407	0.157742
	32:1	1.65815	1.71911	2.03968	2.45449	1.83226	1.80802	2.00375	1.79983	1.96786	1.86096	0.158067	0.041647	0.591703
	32:0	0.0812965	0.0967048	0.130695	0.15385	0.086995	0.0998647	0.080869	0.107562	0.115637	0.0938226	0.0141966	0.00524216	0.258416
	PE (nmol/mg protein)	Wild type				ΔScDIP2				Wild type	ΔScDIP2	Wild type	ΔScDIP2	p value
	40:6	0.000678468	0	0	0	0.000878778	0	0	0	0.000169617	0.000219694	0.000146893	0.000190261	0.862759
	38:4	0.00192178	0.00166409	0.00155829	0.00225923	0.00205054	0.0016587	0.00118697	0.00101223	0.00185085	0.00147711	0.000135157	0.000203424	0.233317
	36:4	0.0181365	0.0192581	0.026108	0.0326205	0.0203686	0.0200204	0.0153952	0.0171599	0.0240308	0.0182361	0.00291139	0.00102957	0.155272
	36:2	0.0930583	0.081064	0.0820458	0.107886	0.129985	0.112861	0.0671541	0.0743929	0.0910134	0.0960984	0.00540983	0.013082	0.766265
	36:1	0.0536285	0.0551733	0.0595793	0.0729965	0.0552953	0.0508023	0.0326734	0.039886	0.0603444	0.0446642	0.00381204	0.00445328	0.0597342
	36:0	0.00335079	0.00410771	0.00435706	0.00450843	0.00373238	0.00325803	0.00201725	0.0028799	0.004081	0.00297189	0.000222603	0.000314248	0.0468957
	34:2	0.980339	0.961472	1.12657	1.46785	1.36475	1.2907	0.956709	0.938678	1.13406	1.13771	0.101516	0.095959	0.982667
	34:1	0.560666	0.601254	0.725586	0.979576	0.709247	0.662431	0.486901	0.566466	0.716771	0.606261	0.0817224	0.0430055	0.33999
	34:0	0.0306811	0.0337843	0.0430676	0.0524717	0.0388101	0.0360283	0.0282231	0.0308135	0.0400012	0.0334688	0.00426051	0.00208639	0.278076
	32:1	0.393318	0.385591	0.500169	0.682148	0.480069	0.448508	0.328822	0.377351	0.490306	0.408687	0.0598292	0.0296241	0.330462
	32:0	0.0211028	0.0217598	0.0270645	0.03714	0.0253364	0.022715	0.0165161	0.0216373	0.0267668	0.0215512	0.00320978	0.00160159	0.254743
	PI (nmol/mg protein)	Wild type				ΔScDIP2				Wild type	ΔScDIP2	Wild type	ΔScDIP2	p value
	40:6	0.00083862	0	0	0	0	0.000253322	0	0	0.000209655	6.33305e-05	0.000181567	5.48458e-05	0.528909
	38:4	0.000758751	0.00108399	0.00118791	0.00265968	0.00142244	0.000852887	0.00187109	0.00110898	0.00142258	0.00131385	0.000365787	0.000189863	0.826851
	36:4	0.00479227	0.00538754	0.00568092	0.00626531	0.00519941	0.00426015	0.00568196	0.00448602	0.00553151	0.00490689	0.000265519	0.000283031	0.212788
	36:2	0.0380627	0.040951	0.0515656	0.07196	0.0488244	0.0581142	0.0463573	0.0442425	0.0506348	0.0493846	0.00664956	0.00264724	0.884713
	36:1	0.892496	0.945297	1.07697	1.20335	1.12164	1.09376	1.17614	0.92521	1.02953	1.07919	0.060382	0.0468531	0.594014
	36:0	0.0519676	0.066683	0.069251	0.0606358	0.0701775	0.0701844	0.0803055	0.049329	0.0621343	0.0674991	0.00332552	0.0056377	0.504458
	34:2	0.0110711	0.0100034	0.0114747	0.0161586	0.00680071	0.00877789	0.0100683	0.00874993	0.012177	0.0085992	0.00118042	0.000583487	0.0568175
	34:1	1.63497	1.61723	1.94176	2.63385	1.96493	1.90167	2.10453	1.7844	1.95695	1.93888	0.205778	0.0577543	0.944009
	34:0	0.115571	0.133025	0.143813	0.204169	0.128573	0.147406	0.167313	0.123631	0.149145	0.141731	0.0166643	0.00861451	0.743819
	32:1	1.32424	1.51499	1.64228	2.22763	1.59776	1.6009	1.65633	1.43964	1.67728	1.57366	0.16865	0.0404026	0.623331
	32:0	0.102877	0.155695	0.167235	0.24583	0.145806	0.18139	0.161284	0.147303	0.167909	0.158946	0.0255569	0.00714768	0.779744
	PA (nmol/mg protein)	Wild type				ΔScDIP2				Wild type	ΔScDIP2	Wild type	ΔScDIP2	p value
	40-6	0.00549459	0.00691911	0.00402914	0.00721622	0.00735434	0.0077984	0.00787246	0.00456221	0.00591477	0.00689685	0.000634165	0.000681197	0.396034
	38-4	0.000878554	0.00111599	0.000527995	0.00106253	0.000617471	0.000628341	0.00135143	0.000800061	0.000896268	0.000849326	0.000115071	0.0001494	0.836456
	36-4	0.00133106	0.00137024	0.00128951	0.00116428	0.00130904	0.00104986	0.00117329	0	0.00128877	0.000883046	3.86686e-05	0.000259001	0.228225
	36-2	0.117517	0.14973	0.157114	0.188018	0.113565	0.159777	0.119949	0.11189	0.153095	0.126295	0.0125323	0.00978148	0.194609
	36-1	0.0612304	0.0628444	0.0729162	0.101814	0.0603398	0.0682836	0.0792912	0.0547478	0.0747012	0.0656656	0.00814065	0.00461026	0.43496
	36-0	0.0303611	0.0345635	0.0338974	0.0597324	0.0295746	0.041839	0.0473229	0.0360935	0.0396386	0.0387075	0.0058553	0.00330032	0.908424
	34-2	0.0560887	0.0489618	0.0488767	0.0901952	0.0623663	0.0629481	0.0694551	0.0523415	0.0610306	0.0617778	0.00854534	0.00305881	0.945483
	34-1	0.510592	0.810867	1.00327	2.14649	0.520297	0.869105	1.03966	0.847598	1.1178	0.819166	0.30966	0.0939563	0.454628
	34-0	0.184996	0.174359	0.195318	0.304105	0.226044	0.223374	0.257761	0.193384	0.214694	0.225141	0.0260753	0.0113922	0.761315
	32-1	1.48181	1.51605	1.76991	2.50179	1.52421	1.59785	1.93257	1.4483	1.81739	1.62573	0.205255	0.0924369	0.488748
	32-0	0.0406768	0.0513972	0.0607292	0.107543	0.0537819	0.0483834	0.0557925	0.0493341	0.0650865	0.051823	0.0127592	0.00153338	0.405839
	PG (nmol/mg protein)	Wild type				ΔScDIP2				Wild type	ΔScDIP2	Wild type	ΔScDIP2	p value
	40:6	0.0256995	0.0249338	0.0250305	0.0308799	0.0254965	0.0268993	0.0264081	0.0186139	0.0266359	0.0243544	0.00123398	0.00167616	0.379129
	38:4	0.00212903	0.00141302	0.00134477	0.00186767	0.00186949	0.0016338	0.00160657	0.00127697	0.00168862	0.00159671	0.000162058	0.00010551	0.694911
	36:4	0.00249545	0.00540194	0.00526591	0.00699586	0.00228833	0.00294168	0.0035429	0.00486995	0.00503979	0.00341072	0.000809403	0.000476089	0.183677
	36:2	1.16555	1.28384	1.52438	1.87625	1.111	1.30387	1.88802	1.24325	1.46251	1.38654	0.135812	0.148905	0.755172
	36:1	0.0202615	0.024054	0.0292203	0.0341496	0.0187373	0.025709	0.0275134	0.0184751	0.0269214	0.0226087	0.00262331	0.00202704	0.302949
	36:0	0.00355855	0.00450271	0.00426589	0.006339	0.00504822	0.00617879	0.00675988	0.00338901	0.00466654	0.00534398	0.000513088	0.000642799	0.502438
	34:2	0.181166	0.255036	0.329431	0.329542	0.0811541	0.0790395	0.29708	0.187838	0.273794	0.161278	0.0307563	0.0449519	0.123823
	34:1	0.278134	0.321606	0.32914	0.434353	0.113074	0.166782	0.371995	0.233348	0.340808	0.2213	0.0287049	0.0484375	0.115669
	34:0	0.0122474	0.0131813	0.0119663	0.0179381	0.010515	0.0140034	0.0139664	0.00552478	0.0138333	0.0110024	0.00120612	0.00173266	0.289631
	32:1	0.0535654	0.0449627	0.0391052	0.0497126	0.0463202	0.0482757	0.0448805	0.0312337	0.0468365	0.0426775	0.00270224	0.00335803	0.435375
	32:0	0.0066536	0.00597538	0.00570161	0.00839329	0.00625301	0.00672633	0.00612791	0.00479266	0.00668097	0.00597498	0.000523795	0.000359088	0.372851
														Average		SEM
	Lyso PA (pmol/mg protein)	Wild type						ΔScDIP2						Wild type	ΔScDIP2	Wild type	ΔScDIP2	p value
	16:0	2.31	2.88	3.24	2.1	1.81	1.96	2.35	2.67	2.19	3.13	3.09	1.75	2.38333	2.53	0.209107	0.200666	0.653985
	18:0	5.62	5.62	5.34	6.66	7.19	5.04	6.23	4.55	7.09	6.12	5.79	6.85	5.91167	6.105	0.309609	0.335756	0.707274
	18:1	7.12	7.23	6.89	6.54	8.09	7.78	6.56	7.89	8.91	6.24	6.48	7.35	7.275	7.23833	0.21303	0.382371	0.940553
