# Supplementary material for: DIP2 is a unique regulator of diacylglycerol lipid homeostasis in eukaryotes
Source: eLife. 2022 Jun 29;11:e77665. doi: 10.7554/eLife.77665 (PMC9342972; doi:10.7554/eLife.77665)
Supplement: Figure 2—figure supplement 2—source data 1. [file elife-77665-fig2-figsupp2-data1.xlsx]

## Sheet: Sheet1
														Average		SEM
	FFA	Wild type						ΔScDIP2						Wild type	ΔScDIP2	Wild type	ΔScDIP2	p value
	12:00:00	1.48579	1.62983	2.45813	0.393649	1.99468	1.97817	2.33882	1.76101	2.06402	1.92787	2.05951	2.31746	1.65671	2.07811	0.262736	0.0831532	0.192952
	14:00	0.513707	1.34266	1.24088	1.1223	1.27235	1.14621	1.14498	1.14161	1.46634	1.11841	1.25184	1.10372	1.10635	1.20448	0.11237	0.051604	0.485394
	16:00	0.856577	1.16549	1.43027	0.769577	1.22067	1.06852	1.43981	0.979312	1.6819	0.873947	1.10044	1.60679	1.08518	1.28037	0.0906815	0.127081	0.280342
	18:00	0.655999	0.801695	1.15005	0.899673	1.00905	0.986946	1.18218	1.01625	0.800932	0.918816	1.17472	1.00877	0.917236	1.01694	0.0644194	0.0549121	0.307509
	18:01	0.610743	0.739115	1.17334	0.586088	0.790077	0.750254	1.12073	0.99378	1.32412	0.67952	0.690672	1.14498	0.774937	0.992301	0.0787883	0.097	0.143409
	18:02	1.32113	1.55863	2.1421	1.50609	1.74593	1.65025	2.23273	1.7927	2.12915	1.52979	1.83887	1.80571	1.65402	1.88816	0.103881	0.0948064	0.159541
	20:00	0.437627	0.649379	0.906285	0.584061	0.827129	0.642142	0.808912	0.697882	0.936479	0.64809	0.816945	0.706998	0.674437	0.769218	0.0630225	0.0392506	0.270922
	20:01	0.189726	0.155637	0.210149	0.145278	0.232707	0.168848	0.323771	0.134327	0.189644	0.155632	0.200231	0.160816	0.183724	0.19407	0.0124966	0.0252941	0.744728
	20:04	0.0442639	0.0806894	0.0879229	0.059325	0.0867551	1.27224	0.201724	0.103031	0.0878248	0.0786555	0.0735776	0.0618809	0.271866	0.101116	0.182755	0.0190792	0.416115
	22:00	0.170934	0.418857	0.433457	0.358377	0.456141	0.320987	0.422884	0.278751	0.375513	0.351651	0.460895	0.365202	0.359792	0.375816	0.0392193	0.0233168	0.755119
	22:01	0.0866848	0.0786009	0.106436	0.0496151	0.105274	0.0653724	0.130854	0.0679449	0.0556072	0.0538293	0.0866473	0.0985343	0.0819971	0.0822361	0.00832921	0.0110164	0.987708
	22:04	0.00975179	0.0167165	0.0181284	0.0106692	0.0120642	0.0101788	0.0167096	0.0156708	0.0169339	0.010574	0.00885284	0.00600038	0.0129181	0.0124569	0.00134257	0.00172142	0.850921
	22:06	0.0189267	0.0230311	0.0230626	0.0156693	0.015209	0.0128809	0.0437322	0.0235177	0.0271809	0.0131587	0.0141751	0.013802	0.0181299	0.0225944	0.001591	0.00442819	0.406711
	24:00	0.321161	0.452509	0.33214	0.382094	0.423675	0.273109	0.56778	0.261793	0.304754	0.29601	0.434513	0.283356	0.364115	0.358034	0.0251846	0.0445244	0.915741
	24:01	0.0349345	0.0402812	0.0489873	0.0330243	0.0378163	0.0278602	0.0611688	0.0383756	0.050504	0.0378141	0.036618	0.0361764	0.0371506	0.0434428	0.00268018	0.00380353	0.24525
	MAG	Wild type						ΔScDIP2						Wild type	ΔScDIP2	Wild type	ΔScDIP2	p value
	16:00	0.0118927	0.0327403	0.0390575	0.023995	0.0298764	0.0237739	0.0402217	0.028016	0.037665	0.0288626	0.029127	0.0180164	0.0268893	0.0303181	0.00347292	0.002945	0.507461
	18:00	0.0546425	0.111262	0.169126	0.111423	0.122739	0.123406	0.137881	0.131818	0.179585	0.132009	0.116452	0.079055	0.115433	0.129467	0.0136716	0.0121397	0.499472
	18:01	0.00356819	0.01042	0.0155037	0.0122526	0.021009	0.0125794	0.0159057	0.0146152	0.0171354	0.00974354	0.0187781	0.0229862	0.0125555	0.0165273	0.00214462	0.00164329	0.209278
