# Supplementary material for: DIP2 is a unique regulator of diacylglycerol lipid homeostasis in eukaryotes
Source: eLife. 2022 Jun 29;11:e77665. doi: 10.7554/eLife.77665 (PMC9342972; doi:10.7554/eLife.77665)
Supplement: Figure 2—figure supplement 2—source data 2. [file elife-77665-fig2-figsupp2-data2.xlsx]

## Sheet: Sheet1
	Intracellular glycerol concentration (µM/ OD600)
	Wild type				ΔScDIP2
	4.43623	9.61183	2.21812	3.20394	4.18977	5.91497	2.71103	7.14726
