# Supplementary material for: DIP2 is a unique regulator of diacylglycerol lipid homeostasis in eukaryotes
Source: eLife. 2022 Jun 29;11:e77665. doi: 10.7554/eLife.77665 (PMC9342972; doi:10.7554/eLife.77665)
Supplement: Figure 2—figure supplement 3—source data 1. [file elife-77665-fig2-figsupp3-data1.xlsx]

## Sheet: TAG
			TAG (nmole/mg protein) species from mouse embryonic stem cell lines					average	SEM	p-value
			Wild type
		16:0/34:1	4.457	5.533	7.324	7.594	8.576	6.6968	0.66636	Reference
		16:0/36:0	2.596	0.963	1.103	1.448	2.524	1.7268	0.312492	Reference
		16:0/36:1	6.103	3.063	2.604	2.637	3.818	3.645	0.583444	Reference
		16:0/36:2	15.938	10.672	17.995	11.855	16.183	14.5286	1.24516	Reference
		18:0/34:0	4.599	5.482	6.285	4.104	7.358	5.5656	0.521836	Reference
		18:0/34:1	14.36	11.216	12.21	21.895	13.971	14.7304	1.68225	Reference
		18:0/36:0	5.864	4.805	4.308	5.669	7.729	5.675	0.524605	Reference
		18:0/36:1	16.363	17.02	11.281	16.464	14.021	15.0298	0.956377	Reference
		18:0/36:2	47.071	31.617	29.222	28.274	40.428	35.3224	3.25405	Reference
		18:1/32:0	8.342	5.363	5.827	7.405	9.334	7.2542	0.667687	Reference
		18:1/34:0	13.716	11.021	14.745	9.723	15.595	12.96	0.998777	Reference
		18:1/34:1	16.484	21.65	22.884	16.658	22.536	20.0424	1.28052	Reference
		18:1/36:0	14.502	11.808	10.5	8.192	13.04	11.6084	0.966697	Reference
		18:1/36:1	52.716	42.164	43.137	53.223	37.516	45.7512	2.77025	Reference
			ΔMmDIP2A
		16:0/34:1	0.348	0.217	0.612	0.797	0.673	0.5294	0.0958234	3.67365e-05
		16:0/36:0	0.848	0.98	0.134	1.188	2.406	1.1112	0.33008	0.260321
		16:0/36:1	1.403	0.135	1.865	1.08	0.322	0.961	0.291022	0.00620139
		16:0/36:2	0.774	0.07	1.192	1.543	1.17	0.9498	0.224855	1.15147e-05
		18:0/34:0	1.308	2.52	1.201	2.974	1.204	1.8414	0.337294	0.000676926
		18:0/34:1	1.927	1.18	2.322	3.858	2.65	2.3874	0.395256	0.000211683
		18:0/36:0	0.59	1.543	0.204	1.79	4.242	1.6738	0.631227	0.00241171
		18:0/36:1	6.612	1.86	2.794	4.294	6.227	4.3574	0.830996	6.70697e-05
		18:0/36:2	2.281	4.894	4.834	4.409	5.884	4.4604	0.533166	3.14573e-05
		18:1/32:0	0.237	0.252	0.43	1.541	1.268	0.7456	0.245559	3.70942e-05
		18:1/34:0	0.629	1.126	1.876	2.907	3.6	2.0276	0.491436	2.21389e-05
		18:1/34:1	0.823	1.165	4.509	3.336	2.339	2.4344	0.61103	3.87462e-06
		18:1/36:0	2.481	0.993	1.702	3.198	1.778	2.0304	0.335504	3.14358e-05
		18:1/36:1	4.132	8.457	7.176	7.55	8.602	7.1834	0.723325	2.07907e-06
