# Supplementary material for: DIP2 is a unique regulator of diacylglycerol lipid homeostasis in eukaryotes
Source: eLife. 2022 Jun 29;11:e77665. doi: 10.7554/eLife.77665 (PMC9342972; doi:10.7554/eLife.77665)
Supplement: Figure 2—figure supplement 3—source data 2. [file elife-77665-fig2-figsupp3-data2.xlsx]

## Sheet: TAG
		TAG (normalized intensity) species from Drosophila lines
												avergae		SEM		p-value
	TAG	Wild type					ΔDmDIP2					Wild type	ΔDmDIP2	Wild type	ΔDmDIP2
	16:0/32:0	4817920	4932305	5039648	5582041	6173896	5101648	5531055	4279499	6614845	6449280	5309162	5.59527e+06	226116	387190	0.583861
	16:0/32:0	4817920	4932305	5039648	5582041	6173896	5101648	5531055	4279499	6614845	6449280	5309162	5.59527e+06	226116	387190	0.583861
	16:0/34:0	2608296	2749214	2987520	3398722	3434688	2979328	3487173	4209676	4187016	4211855	3035688	3.81501e+06	149405	224275	0.0322829
	16:0/34:1	12800000	14800000	16300000	18000000	17500000	12600000	15300000	17800000	18100000	18500000	15880000	16460000	847302	997838	0.702248
	16:0/36:1	4004524	5159782	6150163	7271664	6608548	4574515	6291663	7413050	7834247	8165108	5.83894e+06	6.85572e+06	512570	583256	0.275205
	16:0/36:2	10400000	12100000	12800000	14500000	13900000	10400000	13100000	15300000	15100000	15200000	12740000	13820000	642869	847302	0.390292
	18:0/34:1	3687439	5265124	5648840	7240900	6379141	4814309	6536010	7658405	8578943	8845465	5.64429e+06	7.28663e+06	531497	660729	0.121454
	18:0/36:2	642229	954316	1056845	1590874	1041724	729444	1188535	1568981	1578778	1621982	1.0572e+06	1.33754e+06	136797	152925	0.256459
	18:1/32:0	8795067	10000000	10900000	11700000	12000000	9159988	11000000	12500000	12700000	13100000	1.0679e+07	1.1692e+07	523319	649349	0.308945
	18:1/34:0	3604825	4527766	5202559	5936045	5750073	4151232	5526637	6575454	6814362	6988395	5.00425e+06	6011216	382060	473820	0.177215
	18:1/34:1	12100000	14700000	15400000	17000000	16400000	12100000	15300000	17800000	17700000	18500000	15120000	16280000	762837	1.05239e+06	0.447779
	18:1/36:1	1252898	1936826	2429688	3426682	2308317	1303022	2171030	2932898	2848799	2968239	2.27088e+06	2.4448e+06	316884	286639	0.725255
	18:1/36:2	4714562	6427844	5863334	8035856	6353787	4633573	5961904	7455220	6991471	7211598	6.27908e+06	6.45075e+06	478938	465675	0.823964
	18:2/34:2	3575109	4002603	3655031	4742909	4678026	6710770	7254933	7371343	7927048	8209730	4.13074e+06	7.49476e+06	221424	235410	1.44354e-05
