# Supplementary material for: DIP2 is a unique regulator of diacylglycerol lipid homeostasis in eukaryotes
Source: eLife. 2022 Jun 29;11:e77665. doi: 10.7554/eLife.77665 (PMC9342972; doi:10.7554/eLife.77665)
Supplement: Figure 2—source data 1. [file elife-77665-fig2-data1.xlsx]

## Sheet: Sheet1
		DAG (nmole/mg protein) species						average	SEM	p-value
		Wild type
	32:0	4.40091	3.43689	2.68564	2.31405	2.94564	2.41825	3.03356	0.291423	Reference
	32:1	16.5527	24.5936	20.1983	17.8106	27.9693	25.3565	22.0802	1.70014	Reference
	34:0	3.43288	2.55573	1.7089	1.43346	1.87116	1.60724	2.10156	0.282679	Reference
	34:1	23.1802	22.5962	17.337	16.0022	23.1175	19.5923	20.3042	1.16973	Reference
	34:2	0.128619	0.206496	0.161778	0.13544	0.134419	0.108181	0.145822	0.0127873	Reference
	36:0	4.31979	1.61684	1.86557	1.33309	1.09243	0.962467	1.86503	0.464936	Reference
	36:1	7.32104	6.43912	4.37686	3.55795	5.73278	4.86699	5.38246	0.516482	Reference
	36:2	0.06338	0.114164	0.088763	0.064359	0.058451	0.05679	0.0743178	0.00845606	Reference
	36:4	0.01123	0.014187	0.024905	0.025422	0.014771	0.012503	0.0171697	0.00235492	Reference
		ΔScDIP2
	32:0	3.57235	8.07579	2.81356	1.86555	7.1028	5.41265	4.80712	0.920036	0.124356
	32:1	25.4572	19.6472	27.5617	14.3183	19.7729	18.1994	20.8261	1.81479	0.655115
	34:0	2.81459	6.4424	1.76094	1.27334	5.86671	4.25936	3.73622	0.798488	0.108606
	34:1	23.3788	17.9674	23.0893	12.82	16.3903	14.3291	17.9958	1.64767	0.321562
	34:2	0.186745	0.123903	0.148568	0.09412	0.119905	0.093476	0.127786	0.0132244	0.391807
	36:0	52.1951	33.4754	45.9614	22.5757	27.7798	25.1763	34.5273	4.47153	5.83711e-05
	36:1	49.9353	38.5388	54.0633	28.086	38.7852	35.6989	40.8513	3.55978	4.13237e-06
	36:2	0.071096	0.055777	0.055875	0.042575	0.057234	0.042425	0.0541637	0.0039922	0.0774666
	36:4	0.013288	0.012763	0.023344	0.020195	0.01136	0.010401	0.0152252	0.00196244	0.575356
