# Supplementary material for: DIP2 is a unique regulator of diacylglycerol lipid homeostasis in eukaryotes
Source: eLife. 2022 Jun 29;11:e77665. doi: 10.7554/eLife.77665 (PMC9342972; doi:10.7554/eLife.77665)
Supplement: Figure 2—source data 2. [file elife-77665-fig2-data2.xlsx]

## Sheet: Sheet1
		DAG (normalized intensity) species in yeast						average	SEM	p-value
		Wild type
	32:0	744.187	679.608	646.731	720.745	629.352	859.497	713.354	31.1791	Reference
	32:1	2420.3	2590.11	3534.21	2086.28	2664.55	2507.66	2633.85	180.652	Reference
	34:0	1392.05	3709.35	5125.75	5246.85	4581.11	4786.1	4140.2	541.232	Reference
	34:1	2473.1	2441.88	3806.37	3036.86	1989.14	3002.54	2791.65	235.825	Reference
	36:0	942.678	1270.27	783.019	1148.81	785.046	1597.72	1087.92	118.163	Reference
	36:1	568	613	441	512	778	462	562.333	46.0776	Reference
		ΔScDIP2
	32:0	3939.74	3398.43	1617.51	1169.57	1866.38	652.192	2107.3	480.725	0.0246708
	32:1	4123.56	1018.53	2324.67	5074.46	3573.8	4002.5	3352.92	540.961	0.276531
	34:0	5107.86	3348.45	6919.08	2386.88	1090.01	1855.06	3451.22	817.125	0.535494
	34:1	5459.65	5884.53	1664.03	6062.22	4996.44	5183.59	4875.07	605.318	0.0151013
	36:0	38645.1	10075.5	18155.7	24934.7	14434.1	23878.1	21687.2	3737.3	0.000514845
	36:1	41741.8	34718.9	21152.1	28526.4	29925	22123.9	29698	2896.77	3.46032e-06
		ScDIP2 complementation (native promoter)
	32:0	2419.94	1152.28	904.962	839.794	785.073	627.644	1121.61	245.527	0.163029
	32:1	3246.86	5035.02	3768.71	5216.31	4998.22	3669.13	4322.37	318.58	0.00180341
	34:0	5694.14	3903.55	4037.81	2993.29	3351.84	2817.82	3799.74	389.848	0.651238
	34:1	7743.71	6982.23	5484.61	4682.31	4561.98	4914.11	5728.16	494.72	0.000631298
	36:0	1901.76	1334.03	888.284	1210.16	950.167	1029.2	1218.93	139.159	0.527184
	36:1	651.578	260.003	454.98	373.925	188.781	559.081	414.725	65.6617	0.123916
		ScDIP2 complementation (pGal1 promoter)
	32:0	0	0	0	0	0	0	0	0	na
	32:1	1350.78	1683.03	966.285	1519.4	2205.55	2412.47	1689.59	201.09	0.00967395
	34:0	3384.75	2477.37	0	0	0	0	977.02	574.129	na
	34:1	2095.53	2431.42	1371.16	1562.5	2487.03	3279.05	2204.45	258.438	0.156492
	36:0	1669.75	1621.87	1351.97	2705.5	2915.88	922.806	1864.63	291.497	0.0478364
	36:1	350.838	354.761	435.601	241.627	605.195	700.694	448.119	64.4295	0.217454
