# Supplementary material for: DIP2 is a unique regulator of diacylglycerol lipid homeostasis in eukaryotes
Source: eLife. 2022 Jun 29;11:e77665. doi: 10.7554/eLife.77665 (PMC9342972; doi:10.7554/eLife.77665)
Supplement: Figure 2—source data 3. [file elife-77665-fig2-data3.xlsx]

## Sheet: Sheet1
		Wild type (log phase)						average
	TAG16:0/36:1	5043665	3811401	4.88266e+06	4.08704e+06	3.96642e+06	4184993	4.32936e+06
	TAG16:0/36:2	21489105	16844685	21769850	18783070	17430765	18510765	19138040
	TAG18:0/34:1	5241145	4.0364e+06	5334050	4478722	4130472	4589441	4.63504e+06
	TAG18:0/36:1	1623317	1203227	1.52503e+06	1.29009e+06	1276706	1.33667e+06	1.37584e+06
	TAG18:0/36:2	6026140	4577931	5483195	4827847	4.20521e+06	5054110	5.02907e+06
	TAG18:1/32:0	6194805	4.89776e+06	6098495	5185115	4764711	5449255	5.43169e+06
	TAG18:1/34:0	4.5945e+06	3735252	4519995	3.83462e+06	3.48813e+06	4115007	4.04792e+06
	TAG18:1/34:1	32538795	28855630	35514675	29760350	29732910	31241590	3.1274e+07
	TAG18:1/36:0	10508440	3232991	5438610	12567350	10781060	7546320	8.3458e+06
	TAG18:1/36:1	10285400	7686320	9479065	8534490	7753305	8768930	8.75125e+06
	TAG18:1/36:2	18353355	14350845	17973035	14769095	14045530	15817515	1.58849e+07
		ΔScDIP2 (log phase)						average	fold change (wt/ΔScDIP2)	% decrease
	TAG16:0/36:1	2.72808e+06	1.22026e+06	3.31283e+06	3137447	2.87931e+06	3.2222e+06	2.75002e+06	1.5743	36.4797
	TAG16:0/36:2	11361845	5291555	13143330	12079585	10634385	12486720	1.08329e+07	1.76666	43.396
	TAG18:0/34:1	3.00502e+06	1.51605e+06	3.79574e+06	3650137	2913680	3440063	3.05345e+06	1.51797	34.1225
	TAG18:0/36:1	850216	468704	1.09693e+06	1026702	932530	1.08121e+06	909382	1.51294	33.9034
	TAG18:0/36:2	3244217	1.5041e+06	3.76859e+06	3684325	2957347	3693973	3.14209e+06	1.60055	37.5215
	TAG18:1/32:0	3.77169e+06	1596659	4076090	3.94488e+06	3.41473e+06	4074807	3.47981e+06	1.56092	35.935
	TAG18:1/34:0	2734273	1107100	3006376	3020720	2693660	2.79329e+06	2.55924e+06	1.58169	36.7765
	TAG18:1/34:1	22153635	9895630	24749365	24555485	20993965	24660395	2.11681e+07	1.47741	32.3141
	TAG18:1/36:0	549452	282967	669922	699406	604646	626140	572089	14.5883	93.1452
	TAG18:1/36:1	5407265	2.60575e+06	6594295	6259030	5573965	6386150	5.47108e+06	1.59955	37.4824
	TAG18:1/36:2	9666275	4149277	11184855	10751595	9661190	11194370	9.43459e+06	1.68369	40.6065
