# Supplementary material for: DIP2 is a unique regulator of diacylglycerol lipid homeostasis in eukaryotes
Source: eLife. 2022 Jun 29;11:e77665. doi: 10.7554/eLife.77665 (PMC9342972; doi:10.7554/eLife.77665)
Supplement: Figure 2—source data 4. [file elife-77665-fig2-data4.xlsx]

## Sheet: Sheet1
		Wil type (log phase, galactose media)						average
	TAG16:0/34:1	3.82247e+06	6.64776e+06	5.68484e+06	4.60766e+06	3.91326e+06	4.42226e+06	4.84971e+06
	TAG16:0/36:1	2.02714e+06	2.79446e+06	2.14224e+06	1.81801e+06	1.92369e+06	1.88545e+06	2.0985e+06
	TAG16:0/36:2	2.85374e+06	4.13199e+06	3.27574e+06	2.92527e+06	2.61043e+06	2.73016e+06	3.08789e+06
	TAG18:0/34:1	3.12231e+06	4.2549e+06	3.50366e+06	3.02623e+06	3.04913e+06	3.09569e+06	3.34199e+06
	TAG18:0/36:1	1.00039e+06	1.43176e+06	1.16578e+06	1.00936e+06	1.01933e+06	993833	1.10341e+06
	TAG18:0/36:2	1.505e+06	1.99061e+06	1.581e+06	1.44007e+06	1.40043e+06	1.34611e+06	1.54387e+06
	TAG18:1/32:0	2.00357e+06	2.39288e+06	1.96951e+06	1.61845e+06	1.65882e+06	1.67448e+06	1.88629e+06
	TAG18:1/34:0	1.55291e+06	2.08117e+06	1.61201e+06	1.32227e+06	1.39152e+06	1.39237e+06	1.55871e+06
	TAG18:1/34:1	4.43803e+06	7.58862e+06	6.65119e+06	5.53877e+06	4.33129e+06	4.99561e+06	5.59059e+06
	TAG18:1/36:0	382912	168544	425383	354538	363812	349826	340836
	TAG18:1/36:1	2.28696e+06	3.10055e+06	2.38305e+06	2.09866e+06	2.04349e+06	2.05255e+06	2.32754e+06
	TAG18:1/36:2	1.99514e+06	2.33741e+06	1.59611e+06	2.08202e+06	1.26118e+06	899156	1.69517e+06
		ScDIP2 Overexpression (log phase, galactose media)						average	fold change (OE/wt)	% increase
	TAG16:0/34:1	8.71727e+06	6.2059e+06	5.58668e+06	4.93904e+06	3.61245e+06	3.88946e+06	5.4918e+06	1.1324	13.2398
	TAG16:0/36:1	4.92275e+06	3.04235e+06	2.67615e+06	2.2742e+06	1.79648e+06	2.20476e+06	2.81945e+06	1.34356	34.3556
	TAG16:0/36:2	6.15919e+06	3.74778e+06	3.18022e+06	2.72153e+06	2.34696e+06	2.73726e+06	3.48216e+06	1.12768	12.7682
	TAG18:0/34:1	6.79836e+06	4.64218e+06	4.20181e+06	3.67628e+06	3.0739e+06	3.46428e+06	4.30947e+06	1.28949	28.9493
	TAG18:0/36:1	2.92571e+06	1.86437e+06	1.7044e+06	1.44781e+06	1.20913e+06	1.326e+06	1.74624e+06	1.58258	58.2582
	TAG18:0/36:2	4.55998e+06	2.94589e+06	2.63271e+06	2.24025e+06	1.96943e+06	2.31794e+06	2.7777e+06	1.79918	79.9183
	TAG18:1/32:0	3.77845e+06	2.26464e+06	1.92468e+06	1.61316e+06	1.35041e+06	1.7078e+06	2.10652e+06	1.11676	11.6756
	TAG18:1/34:0	3.81296e+06	2.3017e+06	2.01134e+06	1.67541e+06	1.30574e+06	1.65578e+06	2.12716e+06	1.36469	36.469
	TAG18:1/34:1	9.76908e+06	7.45455e+06	6.95227e+06	5.96684e+06	4.87538e+06	4.80966e+06	6.63796e+06	1.18735	18.7346
	TAG18:1/36:0	1.36422e+06	833732	725418	598823	475505	540577	756379	2.21919	121.919
	TAG18:1/36:1	1.99046e+06	1.70765e+06	4.30639e+06	3.54318e+06	3.02912e+06	3.39831e+06	2.99585e+06	1.28713	28.7131
	TAG18:1/36:2	1.32147e+06	1.31526e+06	3.67334e+06	2.76868e+06	2.85964e+06	3.56406e+06	2.58374e+06	1.52418	52.4179
