# Supplementary material for: DIP2 is a unique regulator of diacylglycerol lipid homeostasis in eukaryotes
Source: eLife. 2022 Jun 29;11:e77665. doi: 10.7554/eLife.77665 (PMC9342972; doi:10.7554/eLife.77665)
Supplement: Figure 2—source data 5. [file elife-77665-fig2-data5.xlsx]

## Sheet: Sheet1
		DAG (normalized intensity) species in ScDIP2 overexpression yeast strains						average	SEM	p-value
		Wild type
	32:0	6862.97	10013	3239.34	1658.63	1413.44	1083.93	4045.22	1349.84	Reference
	32:1	8442.7	10132	13452.7	7489.76	5736.3	4050.92	8217.39	1237.94	Reference
	34:0	19531.8	13120	19678.9	16875.8	14940.5	13246.3	16232.2	1098.63	Reference
	34:1	6408.49	9299.25	15469.9	8247.49	7436.26	5354.64	8702.67	1337.86	Reference
	36:0	9724.22	9454.55	3175.85	11031.7	5464.18	6876.81	7621.23	1110.35	Reference
	36:1	21318.9	16915	20915.6	20490.9	17898.6	18847.4	19397.7	664.676	Reference
	36:2	1529.37	2044.71	720.623	708.14	401.106	244.766	941.453	260.522	Reference
		ScDIP2 overexpression (pGAL1 promoter)
	32:0	1049.71	1751.19	1674.03	939.742	1354.56	1406.67	1362.65	120.957	0.100907
	32:1	2688.56	3511.04	3160.67	2606.34	2444.19	2019.52	2738.39	197.101	0.00255918
	34:0	16122.4	16563.1	15604.9	15156.6	13722.6	15936.6	15517.7	372.469	0.586301
	34:1	1645.41	2853.83	2669.67	1986.8	2094.79	2324.76	2262.54	167.023	0.00142003
	36:0	4123.32	4253.17	5019.04	3700.58	4605.38	3934.47	4272.66	177.335	0.0216138
	36:1	4467.67	2143.14	1225.36	711.003	1302	1415	1877.36	503.064	3.21904e-09
	36:2	0	0	0	0	0	0	0	0	na
