# Supplementary material for: DIP2 is a unique regulator of diacylglycerol lipid homeostasis in eukaryotes
Source: eLife. 2022 Jun 29;11:e77665. doi: 10.7554/eLife.77665 (PMC9342972; doi:10.7554/eLife.77665)
Supplement: Figure 3—figure supplement 1—source data 1. [file elife-77665-fig3-figsupp1-data1.xlsx]

## Sheet: growth curve
	Growth curve
	Hours	Wild type (OD600)			ΔScDIP2 (OD600)
	0	0.2	0.2	0.2	0.2	0.2	0.2
	4	0.6	0.5	0.6	0.6	0.7	0.4
	8	2.7	1.5	1.4	1.8	2.9	1.1
	12	3.8	3.7	3.7	4.1	4.2	3.1
	16	4.5	4.6	4.6	5.1	5.1	4.7
	20	4.5	4.9	4.9	5.2	5.2	5.2
	24	4.7	4.9	4.8	5.6	5.6	5.5
	28	4.7	5.6	4.8	5.6	5.8	5.5
