# Supplementary material for: DIP2 is a unique regulator of diacylglycerol lipid homeostasis in eukaryotes
Source: eLife. 2022 Jun 29;11:e77665. doi: 10.7554/eLife.77665 (PMC9342972; doi:10.7554/eLife.77665)
Supplement: Figure 3—figure supplement 1—source data 2. [file elife-77665-fig3-figsupp1-data2.xlsx]

## Sheet: Sheet1
		% live cell
	Yeast cell viability assay
		Wild type			ΔScDIP2
	SD (Log phase)	95.0617	96.4706	94.186	96.8554	96.3415	97.6303
	YPD (Log phase)	98.8372	98.6842	98.0952	99.1071	98.2759	97.7273
	YPD (Stationary phase)	90.6504	91.4798	92.3581	93.1343	90.9953	93.7378
