# Supplementary material for: DIP2 is a unique regulator of diacylglycerol lipid homeostasis in eukaryotes
Source: eLife. 2022 Jun 29;11:e77665. doi: 10.7554/eLife.77665 (PMC9342972; doi:10.7554/eLife.77665)
Supplement: Figure 3—figure supplement 1—source data 3. [file elife-77665-fig3-figsupp1-data3.xlsx]

## Sheet: Sheet1
	UPRE reporter signal (mean intensity)					Effect of Tunicamycin (Tm)
	Tunicamycin (μg/ml)	UPRE reporter (wild type cells)	No reporter control			Log phase; Tm=0.4 μg/ml
	0	2389.91	338.96			Wild type	ΔScDip2
	0.2	3501.39	266			1	4.59128
	0.4	7284.75	309.32			1	2.03836
	0.6	11070	352.64			1	1.6221
	0.8	19053.6	270.56
	1	17740.9	255.36
