# Supplementary material for: DIP2 is a unique regulator of diacylglycerol lipid homeostasis in eukaryotes
Source: eLife. 2022 Jun 29;11:e77665. doi: 10.7554/eLife.77665 (PMC9342972; doi:10.7554/eLife.77665)
Supplement: Figure 3—figure supplement 2—source data 3. [file elife-77665-fig3-figsupp2-data3.xlsx]

## Sheet: Sheet1
		DAG (nmole/mg protein) species from yeast strains								average	SEM	p-value
	No chemical supplment		Wild type
		32:0	0.608329	4.59006	4.87174	1.75001	1.52268	2.21515		2.59299	0.648048	Reference
		32:1	3.82626	17.7209	20.7054	12.7868	7.83875	16.5321		13.235	2.38424	Reference
		34:0	0.361167	4.62684	4.48707	1.25791	1.39749	1.63771		2.2947	0.672794	Reference
		34:1	3.46467	18.5407	20.3116	13.1274	7.85065	16.066		13.2269	2.41929	Reference
		36:0	0.599059	5.16115	6.19347	0.788045	1.57604	1.30555		2.60389	0.904978	Reference
		36:1	1.08208	6.09278	6.56943	3.99013	2.41634	5.0989		4.20828	0.798459	Reference
		34:2	0.0524876	0.143553	0.171269	0.107513	0.0722356	0.102909		0.108328	0.0163752	Reference
		36:2	0.0249118	0.054259	0.0572651	0.0402533	0.0330025	0.0327268		0.0404031	0.00480165	Reference
			ΔScDIP2
		32:0	5.64741	5.91602	2.39332	3.06671	2.66517	3.92892		3.93626	0.567646	0.185075
		32:1	17.7839	17.7693	13.5209	20.1102	10.4399	12.0653		15.2816	1.42061	0.516104
		34:0	4.46167	4.91005	2.21273	2.54624	2.66478	3.17906		3.32909	0.411809	0.25889
		34:1	19.8703	20.638	15.6196	21.4426	11.5729	13.4662		17.1016	1.53654	0.245355
		36:0	34.3673	49.2216	46.8465	33.6936	37.9347	33.3192		39.2305	2.62866	2.86086e-07
		36:1	54.5371	57.2611	40.9367	59.5668	31.1248	37.4322		46.8098	4.41001	5.73843e-06
		34:2	0.225316	0.168926	0.106718	0.136018	0.0856287	0.102294		0.137484	0.0194216	0.319441
		36:2	0.0869415	0.0656791	0.0301427	0.0448414	0.0318523	0.0318847		0.048557	0.0086224	0.468113
	Effect of 1 mM Choline chloride on lipidome		Wild type
		32:0	3.05072	5.8763	0.811652	0.609788	0.569226	0.608785		1.92108	0.806567	Reference
		32:1	23.6891	21.7523	7.851	7.05819	6.59598	6.84179		12.298	3.02147	Reference
		34:0	3.91619	5.45874	1.0531	0.853181	0.871468	0.858594		2.16854	0.750045	Reference
		34:1	40.5887	38.9249	13.5424	11.9284	10.4397	10.4961		20.9867	5.43849	Reference
		36:0	5.54131	4.87586	2.61075	2.33202	2.28062	2.25729		3.31631	0.553866	Reference
		36:1	17.2614	15.9879	5.91398	5.06198	4.63264	4.39672		8.87578	2.25022	Reference
		34:2	2.06479	1.93949	0.647882	0.581078	0.532854	0.52722		1.04889	0.276049	Reference
		36:2	0.584329	0.561586	0.177558	0.151702	0.143863	0.146301		0.294223	0.0806322	Reference
			ΔScDIP2
		32:0	2.89679	0.93533	1.09563	1.02076	0.542008	0.723501		1.20234	0.318509	0.466732
		32:1	33.8922	13.1524	9.4508	9.451	8.09158	10.7984		14.1394	3.6623	0.73066
		34:0	2.26491	1.34328	1.66912	1.20669	0.804992	0.959372		1.37473	0.197585	0.372174
		34:1	34.4278	13.4475	9.88691	9.90215	8.74519	10.7135		14.5205	3.68216	0.389912
		36:0	33.7381	22.5138	42.7509	43.0899	22.7856	32.2649		32.8572	3.38356	1.36585e-05
		36:1	45.0398	53.8032	43.2745	48.2764	39.8812	44.7691		45.8407	1.77346	3.48213e-07
		34:2	1.50384	0.554239	0.388432	0.386992	0.350173	0.424519		0.601366	0.166862	0.234035
		36:2	0.40477	0.151445	0.114054	0.102744	0.0993372	0.114142		0.164415	0.0444225	0.227023
