# Supplementary material for: DIP2 is a unique regulator of diacylglycerol lipid homeostasis in eukaryotes
Source: eLife. 2022 Jun 29;11:e77665. doi: 10.7554/eLife.77665 (PMC9342972; doi:10.7554/eLife.77665)
Supplement: Figure 3—figure supplement 2—source data 4. [file elife-77665-fig3-figsupp2-data4.xlsx]

## Sheet: Sheet1
		TAG (normalized intensity) species from yeast strains								average	SEM	p-value
	No chemical supplment		Wild type
		16:0/36:1	5043665	3811401	4.88266e+06	4.08704e+06	3.96642e+06	4184993		4.32936e+06	189732	Reference
		16:0/36:2	21489105	16844685	21769850	18783070	17430765	18510765		19138040	766443	Reference
		18:0/34:1	5241145	4.0364e+06	5334050	4478722	4130472	4589441		4.63504e+06	203814	Reference
		18:0/36:1	1623317	1203227	1.52503e+06	1.29009e+06	1276706	1.33667e+06		1.37584e+06	60555.7	Reference
		18:0/36:2	6026140	4577931	5483195	4827847	4.20521e+06	5054110		5.02907e+06	242886	Reference
		18:1/32:0	6194805	4.89776e+06	6098495	5185115	4764711	5449255		5.43169e+06	224724	Reference
		18:1/34:0	4.5945e+06	3735252	4519995	3.83462e+06	3.48813e+06	4115007		4.04792e+06	165221	Reference
		18:1/34:1	32538795	28855630	35514675	29760350	29732910	31241590		3.1274e+07	914371	Reference
		18:1/36:0	7516544	3873675	4275163	5761744	1872675	6641534		4.99022e+06	767055	Reference
		18:1/36:1	10285400	7686320	9479065	8534490	7753305	8768930		8.75125e+06	374930	Reference
		18:1/36:2	18353355	14350845	17973035	14769095	14045530	15817515		1.58849e+07	696015	Reference
			ΔScDIP2
		16:0/36:1	2.72808e+06	1.22026e+06	3.31283e+06	3137447	2.87931e+06	3.2222e+06		2.75002e+06	290935	0.00197735
		16:0/36:2	11361845	5291555	13143330	12079585	10634385	12486720		1.08329e+07	1.06266e+06	0.000176185
		18:0/34:1	3.00502e+06	1.51605e+06	3.79574e+06	3650137	2913680	3440063		3.05345e+06	309210	0.00296797
		18:0/36:1	850216	468704	1.09693e+06	1026702	932530	1.08121e+06		909382	87669.9	0.00253314
		18:0/36:2	3244217	1.5041e+06	3.76859e+06	3684325	2957347	3693973		3.14209e+06	321398	0.00162175
		18:1/32:0	3.77169e+06	1596659	4076090	3.94488e+06	3.41473e+06	4074807		3.47981e+06	355963	0.00173636
		18:1/34:0	2734273	1107100	3006376	3020720	2693660	2.79329e+06		2.55924e+06	270035	0.00157924
		18:1/34:1	22153635	9895630	24749365	24555485	20993965	24660395		2.11681e+07	2.13806e+06	0.00265501
		18:1/36:0	549453	282967	669922	699406	604646	626140		572089	56240.1	0.00037666
		18:1/36:1	5407265	2.60575e+06	6594295	6259030	5573965	6386150		5.47108e+06	551377	0.00115941
		18:1/36:2	9666275	4149277	11184855	10751595	9661190	11194370		9.43459e+06	999087	0.000685712
	Effect of 1 mM Choline chloride on lipidome		Wild type
		16:0/36:1	10802190	13658375	15879810	12924185	13641145			13381141	727945	Reference
		16:0/36:2	25298050	30450625	31421275	28159855	28646290			28795219	944301	Reference
		18:0/34:1	12659970	15577135	17433875	15444860	16039785			15431125	695192	Reference
		18:0/36:1	2782225	3258376	3.84561e+06	3388254	3.3961e+06			3334114	152147	Reference
		18:0/36:2	5357965	6592060	7550070	6441395	6563460			6500990	311308	Reference
		18:1/32:0	15734490	20072365	19767880	18431410	18242735			18449776	686620	Reference
		18:1/34:0	9103900	11469635	12112035	11085090	11383350			11030802	456150	Reference
		18:1/34:1	47793680	53166515	52188565	51365245	51561130			51215027	814961	Reference
		18:1/36:0	1.6982e+06	2.07497e+06	2.41149e+06	2103772	2.14654e+06			2.08699e+06	102065	Reference
		18:1/36:1	9793610	12676050	13523435	11812515	12460165			12053155	561385	Reference
		18:1/36:2	7942945	10120655	9518755	8596720	8651260			8966067	341809	Reference
			ΔScDIP2
		16:0/36:1	5360795	5719360	8248565	5000000	4.97071e+06	1.9615e+06		5.21016e+06	748502	6.30455e-05
		16:0/36:2	12591160	12849935	18853650	15000000	10980890	3.91016e+06		1.23643e+07	1.84641e+06	8.27369e-05
		18:0/34:1	6058560	6196140	9739110	5000000	5681760	2.14557e+06		5.80352e+06	909047	4.21447e-05
		18:0/36:1	1.46599e+06	1446782	2.04052e+06	1500000	1.29138e+06	571684		1386060	176663	4.11523e-05
		18:0/36:2	2.49185e+06	2516179	3920544	2500000	2306297	916206		2.44185e+06	355274	3.26127e-05
		18:1/32:0	8190475	8533635	12427130	10000000	7585450	3011457		8.29136e+06	1.16032e+06	0.000113599
		18:1/34:0	4509239	4.64228e+06	7041435	5000000	4195752	1.62598e+06		4.50245e+06	647253	5.18583e-05
		18:1/34:1	28356515	29309635	37717380	30000000	25750695	9764390		2.68164e+07	3.45391e+06	0.00028574
		18:1/36:0	919401	914496	1.31161e+06	1000000	805286	334389		880863	118638	7.70733e-05
		18:1/36:1	4.61651e+06	4709874	7186725	5000000	4279134	1660979		4.57554e+06	658295	3.17354e-05
		18:1/36:2	4176758	4.04452e+06	5740320	3500000	3.52787e+06	1.54873e+06		3.75637e+06	505180	4.0281e-05
