# Supplementary material for: DIP2 is a unique regulator of diacylglycerol lipid homeostasis in eukaryotes
Source: eLife. 2022 Jun 29;11:e77665. doi: 10.7554/eLife.77665 (PMC9342972; doi:10.7554/eLife.77665)
Supplement: Figure 3—figure supplement 2—source data 5. [file elife-77665-fig3-figsupp2-data5.xlsx]

## Sheet: Sheet1
	Fold change upon oleic acid (1mM) supplementation
		TAG species	Wild type	ΔScDIP2
		TAG16:0/36:1	5.50411	10.8159
		TAG16:0/36:2	1.51378	3.25025
		TAG18:0/34:1	5.71207	10.685
		TAG18:0/36:1	8.90229	16.5779
		TAG18:0/36:2	3.16765	6.5298
		TAG18:1/32:0	3.67581	7.21297
		TAG18:1/34:0	4.86478	9.14797
		TAG18:1/34:1	1.77842	3.00749
		TAG18:1/36:0	0.810012	14.5883
		TAG18:1/36:1	2.71442	5.2421
		TAG18:1/36:2	0.934016	1.86354
