# Supplementary material for: DIP2 is a unique regulator of diacylglycerol lipid homeostasis in eukaryotes
Source: eLife. 2022 Jun 29;11:e77665. doi: 10.7554/eLife.77665 (PMC9342972; doi:10.7554/eLife.77665)
Supplement: Figure 3—source data 1. [file elife-77665-fig3-data1.xlsx]

## Sheet: Sheet3
Ralative UPR signal
		Log phase
		Wild type	ΔScDip2
		1	1.63909
		1	1.64471
		1	1.54793
		1	1.50882
		1	1.51542
		1	1.4574
