# Supplementary material for: DIP2 is a unique regulator of diacylglycerol lipid homeostasis in eukaryotes
Source: eLife. 2022 Jun 29;11:e77665. doi: 10.7554/eLife.77665 (PMC9342972; doi:10.7554/eLife.77665)
Supplement: Figure 3—source data 2. [file elife-77665-fig3-data2.xlsx]

## Sheet: Sheet1
		Effect of Oleic acid (OL)
		Log phase; OL = 0		Log phase; OL = 1 mM
		Wild type	ΔScDip2	Wild type	ΔScDip2
		1	1.54793	1	1.24281
		1	1.50882	1	1.21474
		1	1.47287	1	1.10555
		1	1.50229	1	1.04285
