# Supplementary material for: DIP2 is a unique regulator of diacylglycerol lipid homeostasis in eukaryotes
Source: eLife. 2022 Jun 29;11:e77665. doi: 10.7554/eLife.77665 (PMC9342972; doi:10.7554/eLife.77665)
Supplement: Figure 3—source data 3. [file elife-77665-fig3-data3.xlsx]

## Sheet: Sheet1
		DAG (nmole/mg protein) species from yeast strains								average	SEM	p-value
	No chemical supplment		Wild type
		32:0	0.608329	4.59006	4.87174	1.75001	1.52268	2.21515		2.59299	0.648048	Reference
		32:1	3.82626	17.7209	20.7054	12.7868	7.83875	16.5321		13.235	2.38424	Reference
		34:0	0.361167	4.62684	4.48707	1.25791	1.39749	1.63771		2.2947	0.672794	Reference
		34:1	3.46467	18.5407	20.3116	13.1274	7.85065	16.066		13.2269	2.41929	Reference
		36:0	0.599059	5.16115	6.19347	0.788045	1.57604	1.30555		2.60389	0.904978	Reference
		36:1	1.08208	6.09278	6.56943	3.99013	2.41634	5.0989		4.20828	0.798459	Reference
		34:2	0.0524876	0.143553	0.171269	0.107513	0.0722356	0.102909		0.108328	0.0163752	Reference
		36:2	0.0249118	0.054259	0.0572651	0.0402533	0.0330025	0.0327268		0.0404031	0.00480165	Reference
			ΔScDIP2
		32:0	5.64741	5.91602	2.39332	3.06671	2.66517	3.92892		3.93626	0.567646	0.185075
		32:1	17.7839	17.7693	13.5209	20.1102	10.4399	12.0653		15.2816	1.42061	0.516104
		34:0	4.46167	4.91005	2.21273	2.54624	2.66478	3.17906		3.32909	0.411809	0.25889
		34:1	19.8703	20.638	15.6196	21.4426	11.5729	13.4662		17.1016	1.53654	0.245355
		36:0	34.3673	49.2216	46.8465	33.6936	37.9347	33.3192		39.2305	2.62866	2.86086e-07
		36:1	54.5371	57.2611	40.9367	59.5668	31.1248	37.4322		46.8098	4.41001	5.73843e-06
		34:2	0.225316	0.168926	0.106718	0.136018	0.0856287	0.102294		0.137484	0.0194216	0.319441
		36:2	0.0869415	0.0656791	0.0301427	0.0448414	0.0318523	0.0318847		0.048557	0.0086224	0.468113
	Effect of 1 mM Oleic acid on lipidome		Wild type
		32:0	2.64396	5.0928	0.703431	0.528483	0.493329	0.527614		1.66493	0.699025	Reference
		32:1	28.4269	26.1027	9.4212	8.46983	7.91517	8.21015		14.7577	3.62576	Reference
		34:0	3.65511	5.09482	0.982891	0.796303	0.81337	0.801354		2.02397	0.700042	Reference
		34:1	28.1771	35.7923	19.4107	27.0974	24.9636	15.0443		25.0809	2.69405	Reference
		36:0	9.23551	8.12643	4.35125	3.88669	3.80104	3.76215		5.52718	0.92311	Reference
		36:1	16.571	15.3484	5.67742	4.8595	4.44734	4.22085		8.52075	2.16021	Reference
		34:2	12.3887	11.6369	3.88729	3.48647	3.19712	3.16332		6.29331	1.65629	Reference
		36:2	5.84329	5.61586	1.77558	1.51702	1.43863	1.46301		2.94223	0.806322	Reference
			ΔScDIP2
		32:0	2.51055	0.810619	0.949543	0.884658	0.46974	0.627034		1.04202	0.276041	0.466732
		32:1	40.6706	15.7829	11.341	11.3412	9.70989	12.9581		16.9673	4.39476	0.73066
		34:0	2.11391	1.25373	1.55785	1.12624	0.751326	0.895414		1.28308	0.184413	0.372174
		34:1	29.3465	19.2747	24.1712	14.1931	32.5348	15.356		22.4794	2.79288	0.554195
		36:0	18.6903	12.569	13.7547	15.4494	13.9277	11.3243		14.2859	0.955711	0.000129066
		36:1	28.0395	37.8242	22.5137	32.5792	37.6043	26.068		30.7715	2.34209	8.08752e-05
		34:2	9.02304	3.32543	2.33059	2.32195	2.10104	2.54711		3.6082	1.00117	0.234035
		36:2	4.0477	1.51445	1.14054	1.02744	0.993372	1.14142		1.64415	0.444225	0.227023
