# Supplementary material for: DIP2 is a unique regulator of diacylglycerol lipid homeostasis in eukaryotes
Source: eLife. 2022 Jun 29;11:e77665. doi: 10.7554/eLife.77665 (PMC9342972; doi:10.7554/eLife.77665)
Supplement: Figure 3—source data 4. [file elife-77665-fig3-data4.xlsx]

## Sheet: Sheet1
		TAG (normalized intensity) species from yeast strains								average	SEM	p-value
	No chemical supplment		Wild type
		16:0/36:1	5043665	3811401	4.88266e+06	4.08704e+06	3.96642e+06	4184993		4.32936e+06	189732	Reference
		16:0/36:2	21489105	16844685	21769850	18783070	17430765	18510765		19138040	766443	Reference
		18:0/34:1	5241145	4.0364e+06	5334050	4478722	4130472	4589441		4.63504e+06	203814	Reference
		18:0/36:1	1623317	1203227	1.52503e+06	1.29009e+06	1276706	1.33667e+06		1.37584e+06	60555.7	Reference
		18:0/36:2	6026140	4577931	5483195	4827847	4.20521e+06	5054110		5.02907e+06	242886	Reference
		18:1/32:0	6194805	4.89776e+06	6098495	5185115	4764711	5449255		5.43169e+06	224724	Reference
		18:1/34:0	4.5945e+06	3735252	4519995	3.83462e+06	3.48813e+06	4115007		4.04792e+06	165221	Reference
		18:1/34:1	32538795	28855630	35514675	29760350	29732910	31241590		3.1274e+07	914371	Reference
		18:1/36:0	7516544	3873675	4275163	5761744	1872675	6641534		4.99022e+06	767055	Reference
		18:1/36:1	10285400	7686320	9479065	8534490	7753305	8768930		8.75125e+06	374930	Reference
		18:1/36:2	18353355	14350845	17973035	14769095	14045530	15817515		1.58849e+07	696015	Reference
			ΔScDIP2
		16:0/36:1	2.72808e+06	1.22026e+06	3.31283e+06	3137447	2.87931e+06	3.2222e+06		2.75002e+06	290935	0.00197735
		16:0/36:2	11361845	5291555	13143330	12079585	10634385	12486720		1.08329e+07	1.06266e+06	0.000176185
		18:0/34:1	3.00502e+06	1.51605e+06	3.79574e+06	3650137	2913680	3440063		3.05345e+06	309210	0.00296797
		18:0/36:1	850216	468704	1.09693e+06	1026702	932530	1.08121e+06		909382	87669.9	0.00253314
		18:0/36:2	3244217	1.5041e+06	3.76859e+06	3684325	2957347	3693973		3.14209e+06	321398	0.00162175
		18:1/32:0	3.77169e+06	1596659	4076090	3.94488e+06	3.41473e+06	4074807		3.47981e+06	355963	0.00173636
		18:1/34:0	2734273	1107100	3006376	3020720	2693660	2.79329e+06		2.55924e+06	270035	0.00157924
		18:1/34:1	22153635	9895630	24749365	24555485	20993965	24660395		2.11681e+07	2.13806e+06	0.00265501
		18:1/36:0	549453	282967	669922	699406	604646	626140		572089	56240.1	0.00037666
		18:1/36:1	5407265	2.60575e+06	6594295	6259030	5573965	6386150		5.47108e+06	551377	0.00115941
		18:1/36:2	9666275	4149277	11184855	10751595	9661190	11194370		9.43459e+06	999087	0.000685712
	Effect of 1 mM Oleic acid on lipidome		Wild type
		16:0/36:1	34481305	5954285	381313	35638880	38292525	28227360		2.38293e+07	6.1255e+06	Reference
		16:0/36:2	39878915	13050385	546264	40537010	42732110	37080120		2.89708e+07	6.60243e+06	Reference
		18:0/34:1	34856145	7432535	459757	39333390	41112025	35660185		2.64757e+07	6.61144e+06	Reference
		18:0/36:1	16438295	1412884	123000	18689580	21725745	15099180		1.22481e+07	3.42144e+06	Reference
		18:0/36:2	22571805	3190226	175431	21998140	26437585	21208760		1.59303e+07	4.18237e+06	Reference
		18:1/32:0	27390955	8403290	362175	29732120	30517990	23388570		1.99659e+07	4.68915e+06	Reference
		18:1/34:0	27593080	5163585	249735	26699995	33383690	25063235		19692220	5.0468e+06	Reference
		18:1/34:1	73661265	28514080	1.38819e+06	73141715	88441305	68563695		5.56184e+07	1.24198e+07	Reference
		18:1/36:0	9468930	5842598	6167496	10100000	12400000	7741565		8.6201e+06	938377	Reference
		18:1/36:1	32506340	5970990	373052	33460345	39814735	30402030		2.37546e+07	6.09158e+06	Reference
		18:1/36:2	20875990	4.82072e+06	303601	20785210	23780430	18454505		1.48367e+07	3.63802e+06	Reference
			ΔScDIP2
		16:0/36:1	34063230	17350770	21019475	40719455	37474955	27836305		2.9744e+07	3.46503e+06	0.460681
		16:0/36:2	42022040	22746400	23313675	46109105	42232755	34834015		35209665	3.76946e+06	0.471043
		18:0/34:1	36403565	18388045	24393985	44632850	41110970	30826920		3.26261e+07	3.74222e+06	0.476873
		18:0/36:1	20033000	7128840	10986895	20538555	18001090	13765490		15075645	2.00391e+06	0.529736
		18:0/36:2	25324210	10817830	15178045	27445735	25482035	18855415		2.05172e+07	2.47828e+06	0.409246
		18:1/32:0	31061580	12316405	15089580	34336885	31615330	26178725		2.50998e+07	3.44844e+06	0.439448
		18:1/34:0	29616465	11302005	14098455	32716405	30197235	22540390		2.34118e+07	3.35518e+06	0.587615
		18:1/34:1	79559945	35754430	37320455	86538480	78641370	64161720		6.36627e+07	8.28891e+06	0.633477
		18:1/36:0	10500000	3232991	5438610	12600000	10800000	7546320		8.35299e+06	1.33326e+06	0.884086
		18:1/36:1	32603845	17546705	18683395	38995015	35610300	28640305		2.86799e+07	3.30702e+06	0.531161
		18:1/36:2	20726265	9896345	14775470	22467440	20801810	16823135		1.75817e+07	1.76102e+06	0.54914
