# Supplementary material for: DIP2 is a unique regulator of diacylglycerol lipid homeostasis in eukaryotes
Source: eLife. 2022 Jun 29;11:e77665. doi: 10.7554/eLife.77665 (PMC9342972; doi:10.7554/eLife.77665)
Supplement: Figure 4—source data 1. [file elife-77665-fig4-data1.xlsx]

## Sheet: Sheet1
		DAG (nmole/mg protein) species from yeast strain across growth phases							average	SEM	p-value
		Wild type
	Early log phase	32:0	3.88856	2.24698	7.20959	2.96094	4.55712	1.63665	3.74998	0.745121	Reference
		34:0	2.9091	1.67179	5.8234	1.65899	3.90994	1.52079	2.91567	0.634991	Reference
		36:0	1.65	3.1262	3.47129	2.57931	0.224993	2.33861	2.23173	0.435706	Reference
		36:1	7.0149	6.92948	6.06057	8.50204	7.54963	7.70418	7.29347	0.308449	Reference
		32:1	19.991	17.3854	17.2893	24.3758	14.6582	14.776	18.0793	1.36445	Reference
		34:1	19.3476	17.7165	18.7839	24.8086	23.152	23.9768	21.2976	1.12903	Reference
		34:2	0.122136	0.119061	0.133226	0.176486	0.165429	0.156134	0.145412	0.00892239	Reference
		36:2	0.0510863	0.0689906	0.0631678	0.0841778	0.0829643	0.0668453	0.0695387	0.00466424	Reference
		36:4	0.0095941	0.015902	0.00702284	0.0115595	0.0138356	0.0160935	0.0123346	0.00134819	Reference
		ΔScDIP2
		32:0	2.53509	2.67836	5.94735	6.30763	2.99836	2.58747	3.84238	0.663733	0.934304
		34:0	1.69034	1.91712	4.03333	5.02516	2.57633	1.82481	2.84451	0.512955	0.938146
		36:0	33.2753	20.899	14.1998	20.7992	5.5185	13.2831	17.9958	3.50418	0.00223107
		36:1	60.2594	44.1513	36.1557	50.816	49.5795	39.4384	46.7334	3.24676	6.37689e-07
		32:1	25.9144	22.1963	18.8851	18.2205	17.1532	18.14	20.0849	1.24426	0.344824
		34:1	26.9999	23.1948	20.4614	27.9101	26.1383	25.2625	24.9945	1.02321	0.0511361
		34:2	0.0951892	0.0846883	0.0966798	0.094321	0.0846163	0.0923995	0.0913157	0.00199157	0.000300651
		36:2	0.0416543	0.0373635	0.0401212	0.0361258	0.0333408	0.044311	0.0388194	0.00148398	0.000190494
		36:4	0.0147953	0.0183978	0.00892542	0.0107985	0.0114344	0.0117843	0.0126893	0.00126005	0.864216
		Wild type
	Stationary phase	32:0	1.99777	2.90666	7.43535	5.7646	1.7488	2.6099	3.74385	0.861627	Reference
		34:0	1.26491	2.34477	5.2311	4.21083	1.50676	2.61275	2.86186	0.580924	Reference
		36:0	2.03268	1.87954	0.769578	0.078265	2.53864	0.350394	1.27485	0.375605	Reference
		36:1	3.50803	4.87857	7.74016	7.17134	7.8501	5.83373	6.16365	0.648878	Reference
		32:1	19.7363	14.4386	21.6387	20.0739	14.914	13.7818	17.4306	1.27597	Reference
		34:1	15.7162	15.609	23.5578	20.5112	24.4269	19.9816	19.9671	1.39585	Reference
		34:2	0.110054	0.192595	0.147155	0.109044	0.165051	0.0907453	0.135774	0.0145477	Reference
		36:2	0.0444392	0.0750573	0.0605615	0.0445418	0.0679735	0.0380332	0.0551011	0.0055534	Reference
		36:4	0.00738677	0.0120649	0.012201	0.0113927	0.0098619	0.0126317	0.0109232	0.000739901	Reference
		ΔScDIP2
		32:0	2.84791	3.16032	4.78656	1.47347	2.16888	7.34741	3.63076	0.795378	0.931585
		34:0	2.25742	2.07667	3.35735	1.3576	1.78835	6.45899	2.88273	0.698796	0.983682
		36:0	0.857391	0.230777	0.327022	0.470129	0.891398	4.3943	1.19517	0.592786	0.919497
		36:1	6.35634	6.96582	5.25155	6.96944	5.96323	5.73896	6.20756	0.256624	0.955329
		32:1	17.2221	19.8841	15.4805	12.6966	13.7047	12.9942	15.3304	1.04582	0.272185
		34:1	18.444	20.6616	16.1693	20.5248	19.4339	19.0157	19.0415	0.614323	0.591726
		34:2	0.105461	0.130623	0.171686	0.144298	0.162564	0.143331	0.142994	0.00877149	0.70616
		36:2	0.0486728	0.0628712	0.0798224	0.0686269	0.0741949	0.0659943	0.0666971	0.00398686	0.152558
		36:4	0.0155653	0.0124048	0.0147173	0.0129814	0.0211051	0.0145603	0.0152224	0.00115924	0.0171394
