# Supplementary material for: DIP2 is a unique regulator of diacylglycerol lipid homeostasis in eukaryotes
Source: eLife. 2022 Jun 29;11:e77665. doi: 10.7554/eLife.77665 (PMC9342972; doi:10.7554/eLife.77665)
Supplement: Figure 4—source data 2. [file elife-77665-fig4-data2.xlsx]

## Sheet: Sheet1
Relative UPR signal
	Stationary phase
	Wild type	ΔScDip2
	1	1.26395
	1	1.23442
	1	1.33987
