# Supplementary material for: DIP2 is a unique regulator of diacylglycerol lipid homeostasis in eukaryotes
Source: eLife. 2022 Jun 29;11:e77665. doi: 10.7554/eLife.77665 (PMC9342972; doi:10.7554/eLife.77665)
Supplement: Figure 5—figure supplement 1—source data 3. [file elife-77665-fig5-figsupp1-data3.xlsx]

## Sheet: ScDIP2-GFP puncta quatification
% of ScDIP2-GFP puncta associated with indicated organellar surface marker
	Mitochondria (MitoTracker stained)	Vacuole (FM4-64 stained)
	50	50
	66.7	33.3
	80	40
	66.7	50
	66.7	50
	100	50
	75	50
	100	25
	80	33.3
	83.3	20
	100	33.3
	100	25
	100	20
	100	25
	66.7	33.3
	100	25
	100	50
	71.4	25
	100	25
	83.3	40
	83.3	33.3
	100	20
	100	20
	80	25
	83.3	33.3
	66.7	20
	100	40
	83.3	33.3
	25	66.7
	80	66.7
	80	20
	20	50
	80	40
	60	50
	80	66.7
	100	20
	85.7	16.7
	100	16.7
	100	0
	75	25
	100	33.3
	20	40
	50	25
	60	14.3
	85.7	14.3
	75	40
	50	0
	100	25
	75	20
	66.7	33.3
	57.1	33.3
	100	25
	100	33.3
	66.7	20
	25	40
	100	28.6
	57.1	25
	50	0
	100	20
	42.9	25
	57.1	20
	100	50
	100	25
	100	16.7
	75	0
	83.3	50
	100	50
	71.4	20
	100	25
	83.3	66.7
	100	33.3
	87.5	33.3
	100	40
	100	25
	83.3	25
	100	33.3
	100	33.3
	100	20
	60	25
	100	28.6
	50	20
	60	40
	100	50
	100	20
	83.3	33.3
	60	25
	66.7	16.7
	100	0
	60	20
	100	50
	66.7	20
	100	25
	83.3	0
	100	33.3
	75	20
	75	50
		33.3
		25
		20
		20
		0
		0
		33.3
		25
		0
		42.9
		28.6
		66.7
		33.3
		33.3
		33.3
		20
		0
		33.3
		20
		14.3
		20
		20
		40
		14.3
		11.1
		16.7

## Sheet: Manders’ overlap coefficient
Manders’ overlap coefficient between ScDIP2-GFP and organellar marker signal
	Mitochondria (MitoTracker)	Vacuole (FM4-64)
	0.617	0.483
	0.613	0.182
	0.57	0.872
	0.705	0.569
	0.728	0.507
	0.632	0.289
	0.834	0.151
	0.373	0.479
	0.611	0.383
	0.426	0.243
	0.589	0.229
	0.618	0.268
	0.815	0.525
	0.563	0.322
	0.538	0.445
	0.565	0.336
	0.819	0.293
	0.428	0.253
	0.62	0.346
	0.725	0.346
	0.74	0.382
	0.786	0.382
	0.675	0.287
	0.707	0.287
	0.593	0.298
	0.676	0.363
	0.499
	0.658
	0.774
