# Supplementary material for: DIP2 is a unique regulator of diacylglycerol lipid homeostasis in eukaryotes
Source: eLife. 2022 Jun 29;11:e77665. doi: 10.7554/eLife.77665 (PMC9342972; doi:10.7554/eLife.77665)
Supplement: Figure 5—source data 1. [file elife-77665-fig5-data1.xlsx]

## Sheet: Sheet1
	Percentage of yeast cell harbouring different number of vacuoles in logarithmic phase of growth
	Number of vacuole/cell	Wild type (% cell)			ΔScDIP2 (% cell)
	1	30.5263	35.6522	38.843	58.5366	57.5	66.6667
	2	40	32.1739	34.7107	30.0813	22.5	22.549
	3	12.6316	18.2609	14.876	6.50406	12.5	8.82353
	>4	16.8421	13.913	11.5702	4.87805	7.5	1.96078
