# Supplementary material for: DIP2 is a unique regulator of diacylglycerol lipid homeostasis in eukaryotes
Source: eLife. 2022 Jun 29;11:e77665. doi: 10.7554/eLife.77665 (PMC9342972; doi:10.7554/eLife.77665)
Supplement: Figure 5—source data 2. [file elife-77665-fig5-data2.xlsx]

## Sheet: Sheet1
		Vacuole diameter (µm)			Average			Size Range (µm)	Count of cells		percentage of cells
	#	Wild type	ΔScDIP2		Wild type	ΔScDIP2			Wild type	∆ScDip2	Wild type	∆ScDip2
	1	1.755	2.491		1.52148	2.14313		0-0.5	0	0	0	0
	2	1.755	2.604					0.5-1.0	0	0	0	0
	3	2.359	2.418					1.0-1.5	16	7	0.0533333	0.0233333
	4	2.496	2.867					1.5-2.0	47	25	0.156667	0.0833333
	5	1.782	2.414					2.0-2.5	104	52	0.346667	0.173333
	6	2.254	1.092					2.5-3.0	82	100	0.273333	0.333333
	7	2.539	2.865					3.0-3.5	38	73	0.126667	0.243333
	8	1.893	2.163					3.5-4.0	11	27	0.0366667	0.09
	9	1.555	1.879					4.0-4.5	2	12	0.00666667	0.04
	10	0.96	2.496					4.5-5.0	0	2	0	0.00666667
	11	2.146	2.206					5.0.-5.5	0	2	0	0.00666667
	12	1.154	2.437
	13	1.435	1.816
	14	1.566	2.736
	15	1.11	2.619
	16	1.888	2.28
	17	1.921	2.284
	18	1.59	2.404
	19	1.764	2.347
	20	1.331	2.67
	21	1.116	2.212
	22	1.171	2.312
	23	1.154	1.811
	24	2.531	2.511
	25	1.265	1.71
	26	1.897	1.918
	27	1.529	2.612
	28	1.265	2.82
	29	1.348	1.707
	30	1.994	2.183
	31	1.215	2.012
	32	1.92	2.388
	33	1.451	1.615
	34	1.529	1.994
	35	1.215	2.167
	36	1.272	1.98
	37	1.426	2.765
	38	1.073	2.146
	39	1.5	2.315
	40	1.475	2.315
	41	2.012	2.495
	42	1.081	2.143
	43	1.804	1.698
	44	1.381	2.214
	45	1.451	1.356
	46	1.154	2.379
	47	1.564	1.92
	48	0.976	2.562
	49	1.696	1.824
	50	1.681	2.377
	51	0.948	1.154
	52	1.146	1.897
	53	1.744	2.22
	54	1.237	2.284
	55	1.237	2.418
	56	1.637	1.994
	57	1.021	1.696
	58	0.9	2.121
	59	1.081	2.232
	60	1.548	1.799
	61	1.622	1.789
	62	1.343	2.377
	63	1.092	2.163
	64	1.564	2.016
	65	0.939	2.22
	66	1.564	2.284
	67	1.507	1.621
	68	1.343	1.863
	69	1.356	1.481
	70	0.848	2.146
	71	1.341	2.163
	72	1.637	1.621
	73	1.621	1.154
	74	1.021	1.5
	75	1.426	2.495
	76	1.98	2.232
	77	1.615	2.163
	78	1.994	2.418
	79	1.4	1.994
	80	1.744	2.495
	81	1.882	3.318
	82	1.57	1.824
	83	1.154	2.418
	84	1.98	1.517
	85	1.615	2.248
	86	1.321	1.953
	87	1.475	2.121
	88	1.106	2.28
	89	1.868	1.906
	90	1.081	2.548
	91	1.116	1.451
	92	0.895	2.28
	93	1.5	2.099
	94	2.15	1.681
	95	1.426	1.57
	96	1.749	2.016
	97	1.824	2.58
	98	1.615	2.22
	99	2.292	1.749
	100	1.92	2.429
	101	1.57	2.284
	102	1.081	2.095
	103	1.4	2.59
	104	1.789	2.15
