# Supplementary material for: DIP2 is a unique regulator of diacylglycerol lipid homeostasis in eukaryotes
Source: eLife. 2022 Jun 29;11:e77665. doi: 10.7554/eLife.77665 (PMC9342972; doi:10.7554/eLife.77665)
Supplement: Figure 5—source data 3. [file elife-77665-fig5-data3.xlsx]

## Sheet: Hypertonic stress 
		Wild type						ΔScDIP2
		Live cells	dead cells	Total cell count	% cell death			Live cells	dead cells	Total cell count	% cell death
No stress	Experiment-1	225	3	228	1.33333		Experiment-1	229	2	231	0.873362
	Experiment-2	175	4	179	2.28571		Experiment-2	195	5	200	2.5641
	Experiment-3	167	2	169	1.1976		Experiment-3	194	2	196	1.03093
		Wild type						ΔScDIP2
Hypertonic stress		Live cells	dead cells	Total cell count	% cell death			Live cells	dead cells	Total cell count	% cell death
	Experiment-1	135	35	170	20.59		Experiment-1	161	93	254	36.6142
	Experiment-2	287	68	355	19.15		Experiment-2	182	94	276	34.058
	Experiment-3	141	24	165	14.55		Experiment-3	158	115	273	42.1245
