# Supplementary material for: DIP2 is a unique regulator of diacylglycerol lipid homeostasis in eukaryotes
Source: eLife. 2022 Jun 29;11:e77665. doi: 10.7554/eLife.77665 (PMC9342972; doi:10.7554/eLife.77665)
Supplement: Figure 6—source data 1. [file elife-77665-fig6-data1.xlsx]

## Sheet: Sheet1
	Percentage of yeast cell harbouring different number of vacuoles in logarithmic phase of growth
	Number of vacuole/cell	Wild type			ScDIP2-OE
	1	34.7107	33.3333	36.8056	11.4286	11.4286	14.0351
	2	38.0165	36.1702	32.6389	12.381	12.381	27.193
	3	12.3967	16.3121	17.3611	42.8571	32.381	27.193
	>4	14.876	14.1844	13.1944	33.3333	43.8095	31.5789
