# Supplementary material for: DIP2 is a unique regulator of diacylglycerol lipid homeostasis in eukaryotes
Source: eLife. 2022 Jun 29;11:e77665. doi: 10.7554/eLife.77665 (PMC9342972; doi:10.7554/eLife.77665)
Supplement: Figure 6—source data 2. [file elife-77665-fig6-data2.xlsx]

## Sheet: Sheet1
	Induced vacuole fusion assay
			Wild type			ScDIP2-OE
			% cell			% cell
	Hypertonic media induced fission		Single-lobe	Multi-lobe		Single-lobe	Multi-lobe
			4	96		4.47761	95.5224
			6.25	93.75		7.08661	92.9134
			3.75	96.25		1.96078	98.0392
			4.65116	95.3488		9.89011	90.1099
			7.2	92.8		2.73973	97.2603
			9.61538	90.3846		6.36364	93.6364
			% cell			% cell
	Hypotonic media induced fusion		Single-lobe	Multi-lobe		Single-lobe	Multi-lobe
			39	61		10.9375	89.0625
			43.956	56.044		20.8955	79.1045
			41.1765	58.8235		13.9535	86.0465
			45.5696	54.4304		12.6761	87.3239
			43.9655	56.0345		11.4754	88.5246
			55.2941	44.7059		15.7895	84.2105
