# Supplementary material for: DIP2 is a unique regulator of diacylglycerol lipid homeostasis in eukaryotes
Source: eLife. 2022 Jun 29;11:e77665. doi: 10.7554/eLife.77665 (PMC9342972; doi:10.7554/eLife.77665)
Supplement: Figure 6—source data 3. [file elife-77665-fig6-data3.xlsx]

## Sheet: Hypotonic stress
		Wild type						ΔScDIP2						ScDIP2 OE
		Live cells	dead cells	Total cell count	% cell death			Live cells	dead cells	Total cell count	% cell death			Live cells	dead cells	Total cell count	% cell death
No hypotonic stress	Experiment-1	172	3	175	1.74419		Experiment-1	223	2	225	0.896861		Experiment-1	138	1	139	0.724638
	Experiment-2	168	2	170	1.19048		Experiment-2	253	3	256	1.18577		Experiment-2	143	2	145	1.3986
	Experiment-3	170	1	171	0.588235		Experiment-3	288	3	291	1.04167		Experiment-3	134	1	135	0.746269
		Wild type						ΔScDIP2						ScDIP2 OE
Hypotonic stress		Live cells	dead cells	Total cell count	% cell death			Live cells	dead cells	Total cell count	% cell death			Live cells	dead cells	Total cell count	% cell death
	Experiment-1	161	11	172	6.39535		Experiment-1	372	6	378	1.5873		Experiment-1	212	45	257	17.5097
	Experiment-2	122	8	130	6.15385		Experiment-2	315	13	328	3.96341		Experiment-2	237	46	283	16.2544
	Experiment-3	158	9	167	5.38922		Experiment-3	527	17	544	3.125		Experiment-3	239	40	279	14.3369
