# Supplementary material for: DIP2 is a unique regulator of diacylglycerol lipid homeostasis in eukaryotes
Source: eLife. 2022 Jun 29;11:e77665. doi: 10.7554/eLife.77665 (PMC9342972; doi:10.7554/eLife.77665)
Supplement: Figure 7—figure supplement 1—source data 3. [file elife-77665-fig7-figsupp1-data3.xlsx]

## Sheet: Sheet1
			DAG (normalized intensity) species from yeast strains						average	SEM
			FLD1 complementation (pGAL1 promoter)
		32:0	2084.89	749.87	1104.3	950.381	1069	617.673	1096.02	193.542
		32:1	4192.28	2595.69	1974.42	2775.75	2728.35	2193.09	2743.26	289.469
		34:0	6211.57	4183.68	3869.57	3327.74	4651.18	3209.3	4242.17	411.335
		34:1	6091.38	2694.7	2670.3	2701.08	2520.82	1648.96	3054.54	574.576
		36:0	21586.2	15403.2	12284.4	14215.1	14523.1	10376.4	14731.4	1421.11
		36:1	32785.5	21407.8	19912.5	22179.9	19031.1	18224.8	22256.9	1998.18
			FLD2 complementation (pGAL1 promoter)
		32:0	1156.15	572.696	943.646	561.656	332.986	606.738	695.645	111.313
		32:1	4949.36	2039.71	1911.48	2458.71	2101.17	2008.95	2578.23	438.52
		34:0	3918.68	3502.91	3128.52	3258.53	3208.14	2471.21	3248	177.496
		34:1	6137.07	2594.05	2803.21	2914.04	3570.58	2573.46	3432.07	512.063
		36:0	22314.5	17536.7	19566.6	14142.1	15123.7	12480.3	16860.7	1365.43
		36:1	19424.8	14928	13066.6	12798.2	10057.4	11627.6	13650.4	1213.86
