# Supplementary material for: DIP2 is a unique regulator of diacylglycerol lipid homeostasis in eukaryotes
Source: eLife. 2022 Jun 29;11:e77665. doi: 10.7554/eLife.77665 (PMC9342972; doi:10.7554/eLife.77665)
Supplement: Figure 7—figure supplement 2—source data 3. [file elife-77665-fig7-figsupp2-data3.xlsx]

## Sheet: vacuole quantification
	Percentage of yeast cell harbouring different number of vacuoles in logarithmic phase of growth
	Number of vacuole/cell	ScDIP2-OE (% cell)			ScDIP2 (D523A)-OE (% cell)			ScDIP2 (L687A)-OE (% cell)
	1	19.6262	13.1579	15.4472	42.1053	54.0881	44.0994	35.1955	34.2857	35.5422
	2	12.1495	18.4211	21.9512	28.655	23.8994	27.3292	25.1397	26.2857	30.1205
	3	37.3832	30.7018	34.1463	16.3743	13.8365	16.1491	16.2011	18.8571	13.253
	>4	30.8411	37.7193	28.4553	12.8655	8.1761	12.4224	23.4637	20.5714	21.0843

## Sheet: Hypotonic stress 
	ScDIP2 OE						ScDIP2(D523A) OE						ScDIP2(L687A) OE
	Total cells	dead cells	% cell death				Total cells	dead cells	% cell death				Total cells	dead cells	% cell death
	146	20	13.6986	Set-1			76	3	3.94737	Set-1			238	8	3.36134	Set-1
	108	21	19.4444				111	7	6.30631				178	8	4.49438
	94	10	10.6383				164	10	6.09756				161	7	4.34783
	157	28	17.8344				174	7	4.02299				222	9	4.05405
	149	27	18.1208	Set-2			162	9	5.55556	Set-2			287	8	2.78746	Set-2
	126	18	14.2857				184	12	6.52174				232	7	3.01724
	146	29	19.863				238	11	4.62185				242	6	2.47934
	117	12	10.2564				234	11	4.70085				267	10	3.74532
	129	21	16.2791	Set-3			221	6	2.71493	Set-3			216	8	3.7037	Set-3
	128	17	13.2812				232	8	3.44828				214	12	5.60748
	135	20	14.8148				231	12	5.19481				221	7	3.16742
	132	29	21.9697				174	7	4.02299				182	11	6.04396
