# Supplementary material for: DIP2 is a unique regulator of diacylglycerol lipid homeostasis in eukaryotes
Source: eLife. 2022 Jun 29;11:e77665. doi: 10.7554/eLife.77665 (PMC9342972; doi:10.7554/eLife.77665)
Supplement: Figure 7—source data 1. [file elife-77665-fig7-data1.xlsx]

## Sheet: Sheet1
		DAG (normalized intensity) species from yeast strains						average	SEM	p-value
		Wild type
	32:0	2314	3312	1872	1987	2133	2765	2397.17	203.644	Reference
	32:1	6563	5514	7561	7654	4745	5165	6200.33	464.191	Reference
	34:0	4376	3282	3834	5513	6541	5341	4814.5	448.706	Reference
	34:1	9871	10891	11765	15431	11212	9713	11480.5	778.559	Reference
	36:0	2367	1876	2108	2245	2983	2762	2390.17	154.138	Reference
	36:1	2765	2872	1289	1998	1762	1531	2036.17	242.664	Reference
		ΔScDIP2
	32:0	2014.17	4118.6	3135.49	2545.34	1861.54	3274.23	2824.9	317.784	0.325265
	32:1	6701.5	5598.48	4061.08	5748.07	3194.87	4179.33	4913.89	488.249	0.11191
	34:0	4860.73	5937.95	3952.3	6400.85	4011.37	6565.31	5288.08	437.443	0.505959
	34:1	12369.7	8743.36	7148.81	10539.1	9739.61	8819.54	9560.02	664.88	0.11761
	36:0	38726	37861	37812	29092	28624	36534	34774.8	1728.7	1.02457e-08
	36:1	27862	31209	30912	25653	28244	27672	28592	788.268	4.8512e-11
		FLD1-FLD2 didomain complementation (pGAL1 promoter)
	32:0	1041.24	1427.06	2591.92	1291.14	1518.6	3235.66	1850.94	321.697	0.219597
	32:1	7025.57	4700.86	6216.47	5978.46	5557.37	6509.72	5998.07	300.12	0.74526
	34:0	5542.46	4150.25	6403.68	5247.98	3729.11	3231.03	4717.42	450.723	0.891942
	34:1	9808.06	13451.8	12095.4	12316.7	7994.44	8444.32	10685.1	838.909	0.540064
	36:0	3948.56	6381.9	7623.45	4372.86	4795.37	4560.76	5280.48	528.461	0.000731223
	36:1	4073.67	3366.95	2170.46	1524.64	1725.05	1664.63	2420.9	392.6	0.46425
