# Supplementary material for: DIP2 is a unique regulator of diacylglycerol lipid homeostasis in eukaryotes
Source: eLife. 2022 Jun 29;11:e77665. doi: 10.7554/eLife.77665 (PMC9342972; doi:10.7554/eLife.77665)
Supplement: Figure 7—source data 2. [file elife-77665-fig7-data2.xlsx]

## Sheet: Sheet1
		TAG (normalized intensity) species from yeast strains
	TAG	Wild type						average	SEM	p-value
	16:0/32:0	2.25744e+06	1.76086e+06	1.09924e+06	1.35551e+06	609510	1.69168e+06	1.46237e+06	213729	Reference
	16:0/34:1	7.40072e+06	6.0508e+06	2.98155e+06	4.89459e+06	1.74173e+06	6.39762e+06	4.91117e+06	807520	Reference
	16:0/34:0	2.17725e+06	1.83184e+06	1.01931e+06	1.24788e+06	514558	1.66673e+06	1.40959e+06	224430	Reference
	16:0/36:2	3.48715e+06	2.76166e+06	1.32341e+06	2.41131e+06	904507	2.89315e+06	2.29687e+06	368470	Reference
	16:0/36:1	3.46721e+06	2.60394e+06	1.22067e+06	2.24896e+06	931839	2.84013e+06	2.21879e+06	363103	Reference
	16:0/36:0	1.21027e+06	976992	521255	672634	304388	949488	772505	124389	Reference
	18:0/34:1	4.67918e+06	3.41496e+06	1.59847e+06	3.02532e+06	1.2645e+06	3.8769e+06	2.97655e+06	492567	Reference
	18:0/34:0	1.49738e+06	1.28015e+06	733332	819535	356225	1.10568e+06	965384	153476	Reference
	18:0/36:2	2.11305e+06	1.57536e+06	703619	1.39101e+06	581381	1.64286e+06	1.33455e+06	219066	Reference
	18:0/36:1	8.29208e+06	8.36597e+06	625482	7.24888e+06	624840	8.53944e+06	5.61611e+06	1.45061e+06	Reference
	18:1/32:0	2.21764e+06	1.68804e+06	747461	1.32608e+06	531588	1.8377e+06	1.39142e+06	243131	Reference
	18:1/34:1	8.82958e+06	7.75514e+06	3.43631e+06	5.99825e+06	1.8429e+06	7.53502e+06	5.89953e+06	1.01703e+06	Reference
	18:1/34:0	2.6642e+06	2.03671e+06	868081	1.67706e+06	757261	2.11754e+06	1.68681e+06	278774	Reference
	18:1/36:2	1.89033e+06	1.55419e+06	803761	1.31763e+06	496326	1.48463e+06	1.25781e+06	192135	Reference
	18:1/36:1	7.99647e+06	6.29303e+06	2.71091e+06	5.4988e+06	2.07006e+06	6.21778e+06	5.13118e+06	851531	Reference
	18:1/36:0	1.90741e+06	1.66648e+06	1.27555e+06	1.55481e+06	1.25354e+06	1.71418e+06	1.562e+06	95835.1	Reference
	TAG	ΔScDIP2						average	SEM	p-value
	16:0/32:0	3.09149e+06	1.99513e+06	1.0299e+06	2.62247e+06	2.46072e+06	2.60392e+06	2.3006e+06	266392	0.0489645	*
	16:0/34:1	1.28169e+06	9.16685e+06	4.15237e+06	7.67536e+06	5.63243e+06	3.39787e+06	5.21776e+06	1.07686e+06	0.839453	ns
	16:0/34:0	1.72862e+06	1.71687e+06	879524	1.30677e+06	2.2428e+06	1.52428e+06	1.56648e+06	170575	0.622444	ns
	16:0/36:2	2.99617e+06	4.47963e+06	1.72827e+06	1.95097e+06	2.69859e+06	2.99514e+06	2.80813e+06	364276	0.388894	ns
	16:0/36:1	3.99228e+06	2.70162e+06	975921	3.17621e+06	3.04185e+06	3.63796e+06	2.92097e+06	393449	0.258817	ns
	16:0/36:0	907993	563101	272980	727408	726128	821590	669867	84182.1	0.546714	ns
	18:0/34:1	5.23682e+06	3.6059e+06	1.37558e+06	4.28661e+06	4.01192e+06	4.79558e+06	3.8854e+06	505774	0.267151	ns
	18:0/34:0	942454	598933	320288	777932	800364	892834	722134	85565.4	0.234997	ns
	18:0/36:2	2.10188e+06	1.58558e+06	533552	1.54137e+06	1.5589e+06	1.98441e+06	1.55095e+06	206012	0.526063	ns
	18:0/36:1	2.27631e+06	1.54186e+06	528410	1.52013e+06	1.49382e+06	1.98733e+06	1.55798e+06	221495	0.030152	*
	18:1/32:0	2.76086e+06	1.69836e+06	630147	2.37534e+06	2.179e+06	2.45434e+06	2.01634e+06	285002	0.15878	ns
	18:1/34:1	7.85044e+06	5.85165e+06	2.52981e+06	7.50092e+06	7.44311e+06	8.64384e+06	6.63663e+06	822965	0.618206	ns
	18:1/34:0	2.99911e+06	1.92913e+06	709751	2.34718e+06	2.25175e+06	2.74318e+06	2.16335e+06	300190	0.313261	ns
	18:1/36:2	1.66339e+06	1.20853e+06	493051	1.17912e+06	1.18889e+06	1.59197e+06	1.22082e+06	155115	0.893952	ns
	18:1/36:1	3.61717e+06	2.69744e+06	913744	2.79347e+06	2.76285e+06	3.68203e+06	2.74445e+06	372571	0.0410516	*
	18:1/36:0	1.03387e+06	563836	186430	732902	698761	946516	693719	112470	0.000317148	***
	TAG	FLD1-FLD2 didomain complementation (pGAL1 promoter)						average	SEM	p-value
	16:0/32:0	2.21481e+06	2.01215e+06	2.02792e+06	968714	352782	1.36741e+06	1.49063e+06	272202	0.942056	ns
	16:0/34:1	3.24004e+06	6.26132e+06	7.3068e+06	4.10855e+06	1.12568e+06	7.07026e+06	4.85211e+06	912406	0.965578	ns
	16:0/34:0	2.19007e+06	1.80653e+06	1.78983e+06	799216	260195	1.15243e+06	1.33304e+06	270593	0.84642	ns
	16:0/36:2	3.52532e+06	3.36953e+06	3.07994e+06	1.52314e+06	489646	2.43929e+06	2.40448e+06	443734	0.868155	ns
	16:0/36:1	4.41366e+06	3.80913e+06	3.54409e+06	1.64025e+06	529948	2.70799e+06	2.77418e+06	544634	0.456534	ns
	16:0/36:0	1.21137e+06	1.01752e+06	998245	435552	145504	633017	740201	151241	0.883292	ns
	18:0/34:1	5.75261e+06	5.13793e+06	4.70989e+06	2.15192e+06	729678	3.58745e+06	3.67825e+06	717440	0.478607	ns
	18:0/34:0	1.40201e+06	1.1739e+06	1.11287e+06	502317	170128	690893	842021	173747	0.637595	ns
	18:0/36:2	1.99245e+06	1.86857e+06	1.62972e+06	812875	273262	1.30589e+06	1.31379e+06	247311	0.955399	ns
	18:0/36:1	9.11122e+06	9.89295e+06	8.67071e+06	763013	780370	8.31545e+06	6.25562e+06	1.59519e+06	0.792086	ns
	18:1/32:0	2.91873e+06	2.58961e+06	2.51145e+06	1.00379e+06	330637	1.7742e+06	1.85474e+06	378479	0.369264	ns
	18:1/34:1	7.51218e+06	9.94747e+06	9.42847e+06	4.18628e+06	1.18174e+06	7.49926e+06	6.6259e+06	1.24751e+06	0.689055	ns
	18:1/34:0	3.12858e+06	2.80823e+06	2.54235e+06	1.15296e+06	384132	1.93987e+06	1.99269e+06	392743	0.574904	ns
	18:1/36:2	1.80791e+06	1.65528e+06	1.56266e+06	787967	256100	1.18298e+06	1.20882e+06	221667	0.88185	ns
	18:1/36:1	7.47934e+06	7.08234e+06	6.24723e+06	2.90959e+06	963388	4.91622e+06	4.93302e+06	952817	0.89024	ns
	18:1/36:0	1.98072e+06	1.87071e+06	1.76203e+06	1.33967e+06	1.11455e+06	1.57555e+06	1.60721e+06	123402	0.797029	ns
