# Supplementary material for: DIP2 is a unique regulator of diacylglycerol lipid homeostasis in eukaryotes
Source: eLife. 2022 Jun 29;11:e77665. doi: 10.7554/eLife.77665 (PMC9342972; doi:10.7554/eLife.77665)
Supplement: Figure 7—source data 3. [file elife-77665-fig7-data3.xlsx]

## Sheet: Sheet1
		DAG (normalized intensity) species from yeast strains
	DAG species	ScDIP2 complementation (pGAL1 promoter)						average	SEM	p-value
	32:1	1351	1683	966	1519	2206	2412	1689.5	201.103	Reference
	34:1	2096	2431	1371	1563	2487	3279	2204.5	258.397	Reference
	36:0	1670	1622	1352	2705	2916	923	1864.67	291.443	Reference
	36:1	351	355	436	242	605	701	448.333	64.3979	Reference
	DAG species	ScDIP2 (D523A) complementation (pGAL1 promoter)						average	SEM	p-value
	32:1	1150	1406	1172	1014	1169	1766	1279.5	100.514	0.126933	ns
	34:1	1936	1933	1643	1913	2087	2317	1971.5	82.7962	0.451272	ns
	36:0	13943	12997	19576	24047	19485	11814	16977	1785.22	1.78497e-05	****
	36:1	13297	11461	14775	13520	20318	20059	15571.7	1390.24	1.71126e-06	****
	DAG species	ScDIP2 (L687A) complementation (pGAL1 promoter)						average	SEM	p-value
	32:1	2196	1118	1792	1536	1646	1402	1615	136.267	0.785212	ns
	34:1	3248	1736	2205	2690	1845	1673	2232.83	232.798	0.942185	ns
	36:0	12927	18088	21535	24237	15789	22299	19145.8	1604.09	2.14767e-06	****
	36:1	14109	21344	17916	21663	22151	16729	18985.3	1210.69	6.97279e-08	****
