# Supplementary material for: DIP2 is a unique regulator of diacylglycerol lipid homeostasis in eukaryotes
Source: eLife. 2022 Jun 29;11:e77665. doi: 10.7554/eLife.77665 (PMC9342972; doi:10.7554/eLife.77665)
Supplement: Figure 7—source data 4. [file elife-77665-fig7-data4.xlsx]

## Sheet: Sheet1
	TAG	ScDIP2 complementation (pGAL1 promoter)						average	SEM	p-value
	16:0/32:0	165693	66732.8	15172.4	175587	104090	193608	120147	26180.5	Reference
	16:0/34:1	321198	475922	104248	431606	952963	719563	500917	111458	Reference
	16:0/34:0	117639	39672	9431.97	127139	76825	137450	84692.8	19309.9	Reference
	16:0/36:2	504642	214500	35972.4	550812	391961	651826	391619	85583	Reference
	16:0/36:1	400550	150555	29235.6	407550	260482	502345	291786	66546.7	Reference
	16:0/36:0	62473.1	23383.8	5585.85	69729.6	35829.8	77852.7	45809.1	10668	Reference
	18:0/34:1	531004	211210	42185.5	532075	338811	664524	386635	86750.6	Reference
	18:0/34:0	63550	23957.2	5033.18	69839	34159.1	70526	44510.7	10231.9	Reference
	18:0/36:2	232834	104627	18663.4	249426	153491	298049	176182	38684.2	Reference
	18:0/36:1	655225	561803	511080	748862	678774	586982	623788	32298.7	Reference
	18:1/32:0	360706	117187	29411.8	402944	251448	456980	269779	62902.3	Reference
	18:1/34:1	580464	637474	117779	751781	557699	508497	525616	80678.5	Reference
	18:1/34:0	299956	110917	24534.2	341339	192358	389708	226469	52845.7	Reference
	18:1/36:2	214167	99962.4	17184.1	235221	150965	240151	159609	32955.4	Reference
	18:1/36:1	419826	175047	29646.2	454009	262975	526624	311355	70462.2	Reference
	18:1/36:0	73160.9	27369.2	5028.11	75706.4	40420.9	91146.9	52138.7	12348.2	Reference
	TAG	ScDIP2 (D523A) complementation (pGAL1 promoter)						average	SEM	p-value
	16:0/32:0	151539	22070.9	197207	164497	106450	61875.2	117273	24744.9	0.94338	ns
	16:0/34:1	485153	148649	571038	492691	873033	532862	517238	86155.3	0.917864	ns
	16:0/34:0	104391	12915.2	154856	125078	73802.3	38746.6	84965	19946.6	0.993036	ns
	16:0/36:2	797171	70424.3	707015	724948	393416	242232	489201	110981	0.5393	ns
	16:0/36:1	489265	51181.9	504038	416089	245584	159308	310911	69698	0.859856	ns
	16:0/36:0	69791.2	8332.95	82713.3	63584	39668.6	24512.7	48100.5	10694.2	0.892616	ns
	18:0/34:1	683069	69315.2	672133	531902	336706	219727	418809	93588.5	0.822607	ns
	18:0/34:0	58603.1	8148.25	84118.6	57402	35572.8	23192.7	44506.2	10260.7	0.999779	ns
	18:0/36:2	383621	36375.7	347744	312851	166892	113709	226866	52510.6	0.494287	ns
	18:0/36:1	190714	19313.7	191585	148893	80347.6	55473.7	114388	27205.2	6.52761e-07	****
	18:1/32:0	386829	43589.1	467045	388362	253940	133140	278817	61524.5	0.927143	ns
	18:1/34:1	480378	200272	538406	492870	362788	695095	461635	62317.6	0.579347	ns
	18:1/34:0	354403	40322.3	403349	345599	204986	108678	242889	55079.4	0.848245	ns
	18:1/36:2	337695	34668.9	329646	314006	166540	122470	217504	47548.8	0.38245	ns
	18:1/36:1	41747.4	60292.4	61158.3	53593.1	30562.5	96144.7	57249.7	8338.75	0.00844122	**
	18:1/36:0	85667.9	10488.4	105210	80940.5	41716.1	25950.9	58328.9	14013.4	0.768437	ns
	TAG	ScDIP2 (L687A) complementation (pGAL1 promoter)						average	SEM	p-value
	16:0/32:0	110423	14467.2	149005	82649.6	48161.9	94968.1	83279.1	17608.4	0.311181	ns
	16:0/34:1	954309	118466	454950	762363	456574	752462	583187	111421	0.643931	ns
	16:0/34:0	79739.6	11465.9	119779	59398.8	40028.5	65660.5	62678.8	13649.4	0.415301	ns
	16:0/36:2	495081	62906.5	703137	490161	266757	473961	415334	82412.7	0.85906	ns
	16:0/36:1	310014	40353.9	432786	273803	173969	234893	244303	49256.9	0.611998	ns
	16:0/36:0	57741.8	6003.37	75795.9	40333.2	24614.2	37797	40380.9	9117.61	0.731341	ns
	18:0/34:1	431070	55530.7	566987	383784	213432	327313	329686	66290.4	0.644193	ns
	18:0/34:0	51279	5802.86	73535.8	37532.6	22948.3	37153.7	38042	8665.48	0.66901	ns
	18:0/36:2	259527	32829.3	335212	247192	137346	200537	202107	39404.6	0.677306	ns
	18:0/36:1	136033	17511.8	181746	112822	63844.5	91434.6	100565	21296.9	2.23547e-07	****
	18:1/32:0	252860	27203.8	378829	212962	135719	195381	200492	43764.6	0.428395	ns
	18:1/34:1	573408	77709	241811	454590	778438	343330	411548	92432	0.415888	ns
	18:1/34:0	242400	31982.4	361839	206786	130285	174493	191298	41272.1	0.642358	ns
	18:1/36:2	295609	30610	358746	270132	144248	215937	219214	43811.5	0.344358	ns
	18:1/36:1	73810	56471.4	99289.7	45682.9	43775.3	39361.6	59731.8	8564.42	0.00892858	**
	18:1/36:0	65978.3	9685.87	94196.5	60898.2	36226.5	44266.2	51875.3	10742.1	0.988564	ns
